# Supplementary material for: The Effect of Nattokinase-Monascus Supplements on Dyslipidemia: A Four-Month Randomized, Double-Blind, Placebo-Controlled Clinical Trial
Source: MDPI journal article supplement (doi:10.3390/nu15194239), 2023-09-30
Supplement: s1 [file s1]

## Supplements

We have a power of 93.91% at a 0.05 two-sided significance level to detect the absolute change from baseline to 120 days for TC (Supplement Table S1).

### Supplement Table S1 Power analysis of primary and secondary outcomes in the intention-to-treat population

| Variables                                         | power  |
|---------------------------------------------------|--------|
| Primary outcomes                                  |        |
| TC                                                |        |
| Baseline, mmol/L                                  | 0.1204 |
| 45-days, mmol/L                                   | 0.9100 |
| Absolute change from baseline to 45-days, mmol/L  | 0.9578 |
| Percentage change from baseline to 45-days, %     | 0.9817 |
| 120-days, mmol/L                                  | 0.7679 |
| Absolute change from baseline to 120-days, mmol/L | 0.9391 |
| Percentage change from baseline to 120-days, %    | 0.9786 |
| TG                                                |        |
| Baseline, mmol/L                                  | 0.0678 |
| 45-days, mmol/L                                   | 0.2846 |
| Absolute change from baseline to 45-days, mmol/L  | 0.1796 |
| Percentage change from baseline to 45-days, %     | 0.2277 |
| 120-days, mmol/L                                  | 0.4616 |
| Absolute change from baseline to 120-days, mmol/L | 0.2796 |
| Percentage change from baseline to 120-days, %    | 0.2218 |
| LDL-C                                             |        |
| Baseline, mmol/L                                  | 0.1339 |
| 45-days, mmol/L                                   | 0.9461 |
| Absolute change from baseline to 45-days, mmol/L  | 0.9983 |
| Percentage change from baseline to 45-days, %     | 0.9992 |
| 120-days, mmol/L                                  | 0.7239 |
| Absolute change from baseline to 120-days, mmol/L | 0.9896 |
| Percentage change from baseline to 120-days, %    | 0.9946 |
| non-HDL-C                                         |        |
| Baseline, mmol/L                                  | 0.0788 |
| 45-days, mmol/L                                   | 0.9684 |
| Absolute change from baseline to 45-days, mmol/L  | 0.9836 |
| Percentage change from baseline to 45-days, %     | 0.9947 |
| 120-days, mmol/L                                  | 0.8713 |
| Absolute change from baseline to 120-days, mmol/L | 0.9400 |
| Percentage change from baseline to 120-days, %    | 0.9843 |
| LDL-C to HDL-C ratio                              |        |

| Variables                                         | power  |
|---------------------------------------------------|--------|
| Baseline                                          | 0.0541 |
| 45-days                                           | 0.8550 |
| Absolute change from baseline to 45-days          | 1.0000 |
| Percentage change from baseline to 45-days, %     | 1.0000 |
| 120-days                                          | 0.6128 |
| Absolute change from baseline to 120-days         | 0.9773 |
| Percentage change from baseline to 120-days, %    | 0.9899 |
| HDL-C                                             |        |
| Baseline, mmol/L                                  | 0.1575 |
| 45-days, mmol/L                                   | 0.3106 |
| Absolute change from baseline to 45-days, mmol/L  | 0.1656 |
| Percentage change from baseline to 45-days, %     | 0.1327 |
| 120-days, mmol/L                                  | 0.1341 |
| Absolute change from baseline to 120-days, mmol/L | 0.0516 |
| Percentage change from baseline to 120-days, %    | 0.0517 |
| Second outcomes                                   |        |
| Right CIMT                                        |        |
| Baseline, mm                                      | 0.0849 |
| 120-days, mm                                      | 0.0627 |
| Absolute change from baseline to 120-days, mm     | 0.1674 |
| Percentage change from baseline to 120-days, %    | 0.0667 |
| Left CIMT                                         |        |
| Baseline, mm                                      | 0.0514 |
| 120-days, mm                                      | 0.0516 |
| Absolute change from baseline to 120-days, mm     | 0.0617 |
| Percentage change from baseline to 120-days, %    | 0.0507 |
| Average (Left and right) CIMT                     |        |
| Baseline, mm                                      | 0.0570 |
| 120-days, mm                                      | 0.0537 |
| Absolute change from baseline to 120-days, mm     | 0.0898 |
| Percentage change from baseline to 120-days, %    | 0.0829 |

## Supplement Table S2 Consort 2010 checklist

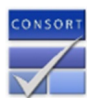

### CONSORT 2010 checklist of information to include when reporting a randomised trial\*

| Section/Topic      | Item No | Checklist item                                    | Reported on page No |
|--------------------|---------|---------------------------------------------------|---------------------|
| Title and abstract |         |                                                   |                     |
|                    | 1a      | Identification as a randomised trial in the title | 1                   |

|                                  |     |                                                                                                                                                                                             |     |
|----------------------------------|-----|---------------------------------------------------------------------------------------------------------------------------------------------------------------------------------------------|-----|
|                                  | 1b  | Structured summary of trial design, methods, results, and conclusions (for specific guidance see CONSORT for abstracts)                                                                     | 1   |
| Introduction                     |     |                                                                                                                                                                                             |     |
| Background and objectives        | 2a  | Scientific background and explanation of rationale                                                                                                                                          | 1-2 |
|                                  | 2b  | Specific objectives or hypotheses                                                                                                                                                           | 2   |
| Methods                          |     |                                                                                                                                                                                             |     |
| Trial design                     | 3a  | Description of trial design (such as parallel, factorial) including allocation ratio                                                                                                        | 2   |
|                                  | 3b  | Important changes to methods after trial commencement (such as eligibility criteria), with reasons                                                                                          | NA  |
| Participants                     | 4a  | Eligibility criteria for participants                                                                                                                                                       | 2   |
|                                  | 4b  | Settings and locations where the data were collected                                                                                                                                        | 2   |
| Interventions                    | 5   | The interventions for each group with sufficient details to allow replication, including how and when they were actually administered                                                       | 3   |
| Outcomes                         | 6a  | Completely defined pre-specified primary and secondary outcome measures, including how and when they were assessed                                                                          | 4   |
|                                  | 6b  | Any changes to trial outcomes after the trial commenced, with reasons                                                                                                                       | NA  |
| Sample size                      | 7a  | How sample size was determined                                                                                                                                                              | 2   |
|                                  | 7b  | When applicable, explanation of any interim analyses and stopping guidelines                                                                                                                | 2-3 |
| Randomisation:                   |     |                                                                                                                                                                                             |     |
| Sequence generation              | 8a  | Method used to generate the random allocation sequence                                                                                                                                      | 2-3 |
|                                  | 8b  | Type of randomisation; details of any restriction (such as blocking and block size)                                                                                                         | 2-3 |
| Allocation concealment mechanism | 9   | Mechanism used to implement the random allocation sequence (such as sequentially numbered containers), describing any steps taken to conceal the sequence until interventions were assigned | 2-3 |
| Implementation                   | 10  | Who generated the random allocation sequence, who enrolled participants, and who assigned participants to interventions                                                                     | 2-3 |
| Blinding                         | 11a | If done, who was blinded after assignment to interventions (for example, participants, care providers, those assessing outcomes) and how                                                    | 3   |
|                                  | 11b | If relevant, description of the similarity of interventions                                                                                                                                 | 3   |

|                                                      |     |                                                                                                                                                   |                |
|------------------------------------------------------|-----|---------------------------------------------------------------------------------------------------------------------------------------------------|----------------|
| Statistical methods                                  | 12a | Statistical methods used to compare groups for primary and secondary outcomes                                                                     | 4              |
|                                                      | 12b | Methods for additional analyses, such as subgroup analyses and adjusted analyses                                                                  | 4              |
| Results                                              |     |                                                                                                                                                   |                |
| Participant flow (a diagram is strongly recommended) | 13a | For each group, the numbers of participants who were randomly assigned, received intended treatment, and were analysed for the primary outcome    | 3              |
|                                                      | 13b | For each group, losses and exclusions after randomisation, together with reasons                                                                  | 3              |
| Recruitment                                          | 14a | Dates defining the periods of recruitment and follow-up                                                                                           | 2-3            |
|                                                      | 14b | Why the trial ended or was stopped                                                                                                                | 3              |
| Baseline data                                        | 15  | A table showing baseline demographic and clinical characteristics for each group                                                                  | 5              |
| Numbers analysed                                     | 16  | For each group, number of participants (denominator) included in each analysis and whether the analysis was by original assigned groups           | 3              |
| Outcomes and estimation                              | 17a | For each primary and secondary outcome, results for each group, and the estimated effect size and its precision (such as 95% confidence interval) | 6-8            |
|                                                      | 17b | For binary outcomes, presentation of both absolute and relative effect sizes is recommended                                                       | NA             |
| Ancillary analyses                                   | 18  | Results of any other analyses performed, including subgroup analyses and adjusted analyses, distinguishing pre-specified from exploratory         | 9-10           |
| Harms                                                | 19  | All important harms or unintended effects in each group (for specific guidance see CONSORT for harms)                                             | 11             |
| Discussion                                           |     |                                                                                                                                                   |                |
| Limitations                                          | 20  | Trial limitations, addressing sources of potential bias, imprecision, and, if relevant, multiplicity of analyses                                  | 11             |
| Generalisability                                     | 21  | Generalisability (external validity, applicability) of the trial findings                                                                         | 10-11          |
| Interpretation                                       | 22  | Interpretation consistent with results, balancing benefits and harms, and considering other relevant evidence                                     | 10-11          |
| Other information                                    |     |                                                                                                                                                   |                |
| Registration                                         | 23  | Registration number and name of trial registry                                                                                                    | 12             |
| Protocol                                             | 24  | Where the full trial protocol can be accessed, if available                                                                                       | No publication |
| Funding                                              | 25  | Sources of funding and other support (such as supply of drugs), role of funders                                                                   | 12             |

\*We strongly recommend reading this statement in conjunction with the CONSORT 2010 Explanation

and Elaboration for important clarifications on all the items. If relevant, we also recommend reading CONSORT extensions for cluster randomised trials, non-inferiority and equivalence trials, non-pharmacological treatments, herbal interventions, and pragmatic trials. Additional extensions are forthcoming: for those and for up to date references relevant to this checklist, see [www.consort-statement.org](http://www.consort-statement.org).

Supplement Figure S1 Consort 2010 flow diagram

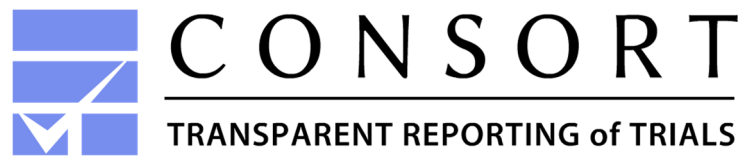

CONSORT 2010 Flow Diagram

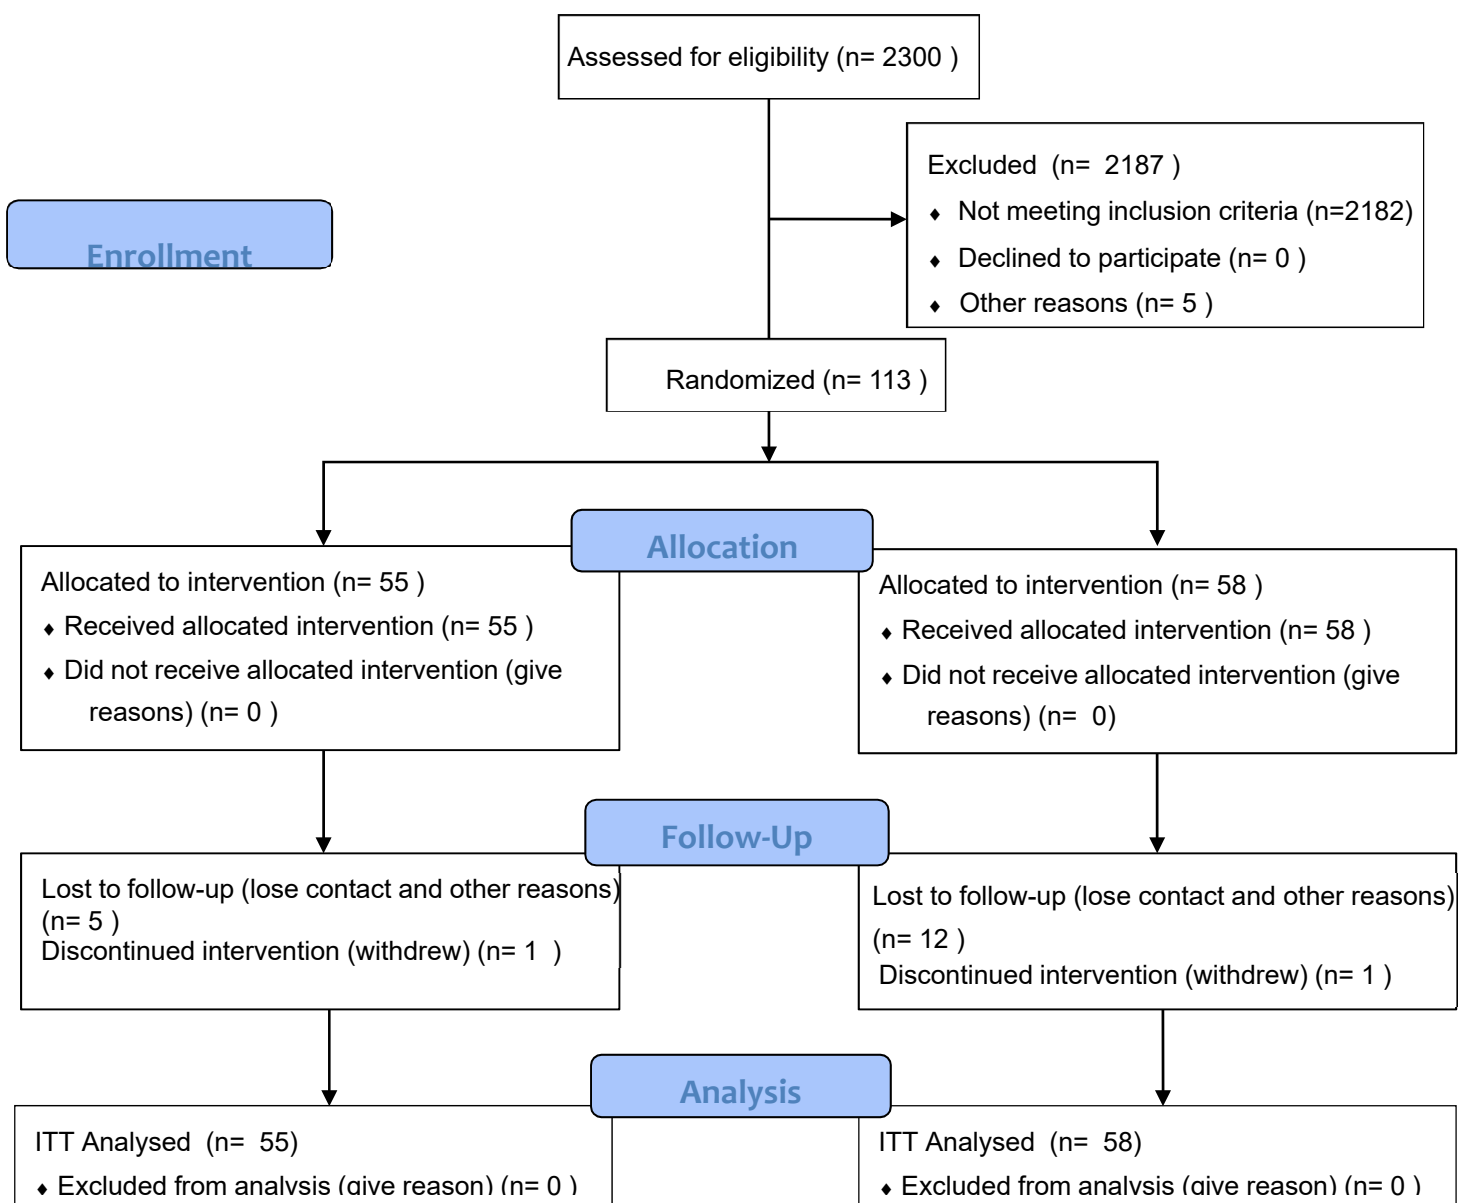

Supplement Figure S1 Consort 2010 flow diagram

## Supplement Figure S2 Lipids between the intervention and control groups

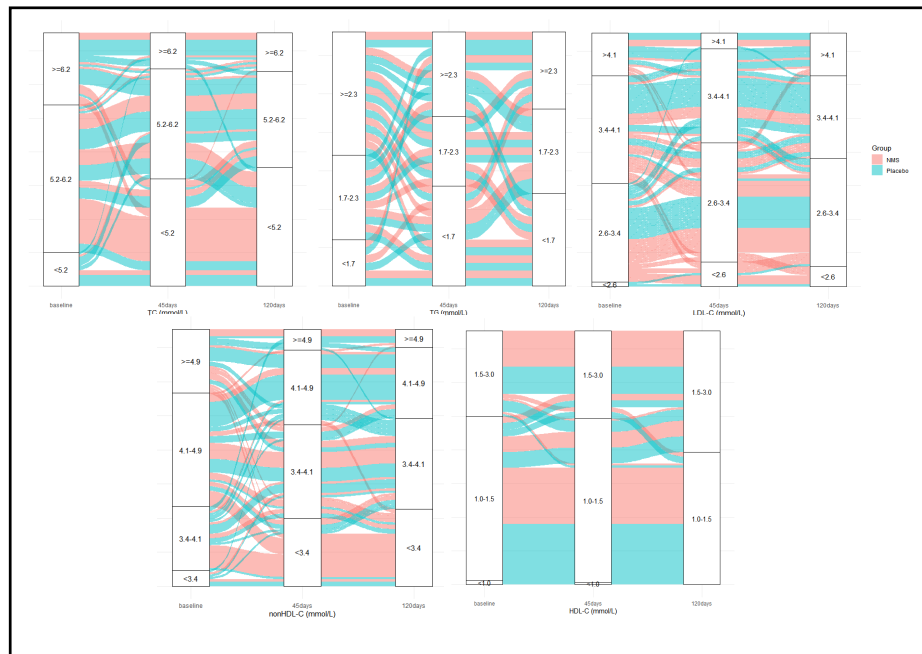

## Supplement Figure S2 Lipids between the intervention and control groups

In the per-protocol population analysis, indicators remained consistent with previous conclusions (Supplement Table S3).

## Supplement Table S3 Primary and second outcomes in the per-protocol population

| End outcomes                                      | NMS (n=48)                | Placebo (n=44)           | NMS vs. placebo          |         |
|---------------------------------------------------|---------------------------|--------------------------|--------------------------|---------|
|                                                   | mean (95%CI)              |                          | mean difference (95%CI)  | P value |
| Primary outcomes                                  |                           |                          |                          |         |
| TC                                                |                           |                          |                          |         |
| Baseline, mmol/L                                  | 5.98 (5.75 to 6.21)       | 5.92 (5.63 to 6.20)      | 0.07 (0.13 to 0.01)      | 0.642   |
| 45-days, mmol/L                                   | 4.96 (4.77 to 5.14) ***   | 5.44 (5.25 to 5.64) ***  | -0.49 (-0.48 to -0.50)   | <0.001  |
| Absolute change from baseline to 45-days, mmol/L  | -1.03 (-1.21 to -0.84)    | -0.47 (-0.70 to -0.24)   | -0.56 (-0.51 to -0.60)   | <0.001  |
| Percentage change from baseline to 45-days, %     | -16.72 (-19.44 to -14.01) | -6.63 (-10.46 to -2.80)  | -10.09 (-8.98 to -11.20) | <0.001  |
| 120-days, mmol/L                                  | 5.01 (4.78 to 5.24) ***   | 5.45 (5.26 to 5.64) ***  | -0.44 (-0.49 to -0.40)   | 0.001   |
| Absolute change from baseline to 120-days, mmol/L | -0.97 (-1.15 to -0.80)    | -0.47 (-0.70 to -0.23)   | -0.51 (-0.45 to -0.57)   | 0.001   |
| Percentage change from baseline to 120-days, %    | -16.11 (-18.81 to -13.41) | -6.56 (-10.10 to -3.03)  | -9.54 (-8.71 to -10.38)  | <0.001  |
| TG                                                |                           |                          |                          |         |
| Baseline, mmol/L                                  | 2.69 (2.36 to 3.03)       | 2.75 (2.42 to 3.08)      | -0.06 (-0.06 to -0.05)   | 0.555   |
| 45-days, mmol/L                                   | 1.97 (1.65 to 2.30) ***   | 2.12 (1.90 to 2.34) ***  | -0.15 (-0.26 to -0.05)   | 0.070   |
| Absolute change from baseline to 45-days, mmol/L  | -0.72 (-0.97 to -0.47)    | -0.63 (-0.90 to -0.36)   | -0.09 (-0.07 to -0.12)   | 0.529   |
| Percentage change from baseline to 45-days, %     | -25.06 (-32.39 to -17.73) | -17.28 (-26.21 to -8.36) | -7.78 (-6.19 to -9.38)   | 0.141   |
| 120-days, mmol/L                                  | 1.93 (1.70 to 2.17) ***   | 2.19 (1.96 to 2.42) ***  | -0.26 (-0.26 to -0.25)   | 0.077   |

| End outcomes                                      | NMS (n=48)                | Placebo (n=44)           | NMS vs. placebo<br>mean difference<br>(95%CI) | P value |
|---------------------------------------------------|---------------------------|--------------------------|-----------------------------------------------|---------|
| Primary outcomes                                  |                           |                          |                                               |         |
| Absolute change from baseline to 120-days, mmol/L | -0.76 (-1.00 to -0.52)    | -0.56 (-0.79 to -0.33)   | -0.20 (-0.21 to -0.19)                        | 0.215   |
| Percentage change from baseline to 120-days, %    | -24.07 (-31.63 to -16.52) | -14.67 (-24.07 to -5.26) | -9.41 (-7.56 to -11.25)                       | 0.098   |
| LDL-C                                             |                           |                          |                                               |         |
| Baseline, mmol/L                                  | 3.66 (3.47 to 3.85)       | 3.60 (3.43 to 3.77)      | 0.06 (0.04 to 0.07)                           | 0.746   |
| 45-days, mmol/L                                   | 3.04 (2.88 to 3.20) ***   | 3.52 (3.39 to 3.64)      | -0.48 (-0.51 to -0.44)                        | <0.001  |
| Absolute change from baseline to 45-days, mmol/L  | -0.62 (-0.75 to -0.48)    | -0.08 (-0.22 to 0.05)    | -0.53 (-0.54 to -0.53)                        | <0.001  |
| Percentage change from baseline to 45-days, %     | -16.18 (-19.66 to -12.70) | -1.02 (-4.93 to 2.89)    | -15.16 (-14.73 to -15.59)                     | <0.001  |
| 120-days, mmol/L                                  | 3.20 (2.99 to 3.42) ***   | 3.63 (3.47 to 3.78)      | -0.42 (-0.48 to -0.36)                        | 0.002   |
| Absolute change from baseline to 120-days, mmol/L | -0.45 (-0.60 to -0.30)    | 0.03 (-0.12 to 0.17)     | -0.48 (-0.48 to -0.47)                        | <0.001  |
| Percentage change from baseline to 120-days, %    | -12.20 (-16.31 to -8.08)  | 1.88 (-2.29 to 6.05)     | -14.08 (-14.02 to -14.13)                     | <0.001  |
| non-HDL-C                                         |                           |                          |                                               |         |
| Baseline, mmol/L                                  | 4.54 (4.31 to 4.78)       | 4.52 (4.26 to 4.77)      | 0.03 (0.05 to 0.01)                           | 0.994   |
| 45-days, mmol/L                                   | 3.47 (3.28 to 3.66) ***   | 4.03 (3.87 to 4.19) ***  | -0.56 (-0.59 to -0.53)                        | <0.001  |
| Absolute change from baseline to 45-days, mmol/L  | -1.08 (-1.25 to -0.90)    | -0.49 (-0.69 to -0.29)   | -0.59 (-0.56 to -0.61)                        | <0.001  |
| Percentage change from baseline to 45-days, %     | -23.23 (-26.47 to -19.99) | -9.15 (-13.33 to -4.97)  | -14.08 (-13.13 to -15.02)                     | <0.001  |
| 120-days, mmol/L                                  | 3.46 (3.24 to 3.69) ***   | 3.93 (3.79 to 4.08) ***  | -0.47 (-0.55 to -0.39)                        | 0.001   |
| Absolute change from baseline to 120-days, mmol/L | -1.08 (-1.25 to -0.91)    | -0.58 (-0.80 to -0.36)   | -0.50 (-0.45 to -0.55)                        | 0.001   |
| Percentage change from baseline to 120-days, %    | -23.59 (-26.96 to -20.22) | -11.11 (-15.23 to -6.99) | -12.48 (-11.73 to -13.23)                     | <0.001  |
| LDL-C to HDL-C ratio                              |                           |                          |                                               |         |
| Baseline                                          | 2.62 (2.44 to 2.80)       | 2.63 (2.47 to 2.79)      | -0.01 (-0.03 to 0.01)                         | 0.849   |
| 45-days                                           | 2.11 (1.96 to 2.26) ***   | 2.55 (2.39 to 2.70) *    | -0.44 (-0.44 to -0.44)                        | <0.001  |
| Absolute change from baseline to 45-days          | -0.51 (-0.60 to -0.42)    | -0.08 (-0.15 to -0.01)   | -0.43 (-0.45 to -0.41)                        | <0.001  |
| Percentage change from baseline to 45-days, %     | -19.18 (-22.28 to -16.07) | -2.73 (-5.50 to 0.05)    | -16.45 (-16.78 to -16.12)                     | <0.001  |
| 120-days                                          | 2.13 (1.97 to 2.30) ***   | 2.46 (2.31 to 2.60) **   | -0.33 (-0.34 to -0.31)                        | 0.004   |
| Absolute change from baseline to 120-days         | -0.49 (-0.60 to -0.39)    | -0.17 (-0.29 to -0.06)   | -0.32 (-0.31 to -0.33)                        | <0.001  |
| Percentage change from baseline to 120-days, %    | -18.30 (-22.27 to -14.33) | -5.66 (-9.74 to -1.57)   | -12.65 (-12.53 to -12.76)                     | <0.001  |
| HDL-C                                             |                           |                          |                                               |         |
| Baseline, mmol/L                                  | 1.44 (1.36 to 1.52)       | 1.40 (1.32 to 1.48)      | 0.04 (0.04 to 0.04)                           | 0.547   |
| 45-days, mmol/L                                   | 1.49 (1.41 to 1.57) **    | 1.42 (1.34 to 1.49)      | 0.07 (0.07 to 0.07)                           | 0.254   |
| Absolute change from baseline to 45-days, mmol/L  | 0.05 (0.01 to 0.09)       | 0.02 (-0.04 to 0.07)     | 0.03 (0.05 to 0.01)                           | 0.173   |
| Percentage change from baseline to 45-days, %     | 3.93 (1.24 to 6.63)       | 2.18 (-1.79 to 6.16)     | 1.75 (3.03 to 0.47)                           | 0.143   |
| 120-days, mmol/L                                  | 1.54 (1.47 to 1.62) ***   | 1.52 (1.43 to 1.60) ***  | 0.03 (0.04 to 0.01)                           | 0.514   |
| Absolute change from baseline to 120-days, mmol/L | 0.11 (0.06 to 0.15)       | 0.12 (0.06 to 0.17)      | -0.01 (0.00 to -0.03)                         | 0.729   |
| Percentage change from baseline to 120-days, %    | 8.06 (5.04 to 11.09)      | 8.99 (5.00 to 12.99)     | -0.93 (0.04 to -1.91)                         | 0.708   |
| Second outcomes                                   |                           |                          |                                               |         |
| Right CIMT                                        |                           |                          |                                               |         |
| Baseline, mm                                      | 0.82 (0.76 to 0.87)       | 0.81 (0.75 to 0.86)      | 0.01 (0.01 to 0.01)                           | 0.815   |
| 120-days, mm                                      | 0.84 (0.79 to 0.88)       | 0.86 (0.81 to 0.92)      | -0.03 (-0.02 to -0.03)                        | 0.482   |
| Absolute change from baseline to 120-days, mm     | 0.02 (-0.04 to 0.08)      | 0.06 (0.01 to 0.11)      | -0.04 (-0.05 to -0.03)                        | 0.216   |
| Percentage change from baseline to 120-days, %    | 7.42 (-2.50 to 17.35)     | 9.99 (3.01 to 16.97)     | -2.57 (-5.51 to 0.38)                         | 0.227   |
| Left CIMT                                         |                           |                          |                                               |         |
| Baseline, mm                                      | 0.86 (0.80 to 0.92)       | 0.90 (0.83 to 0.97)      | -0.04 (-0.03 to -0.04)                        | 0.574   |



| End outcomes                                   | NMS ( <i>n</i> =48)  | Placebo ( <i>n</i> =44) | NMS vs. placebo         |                |
|------------------------------------------------|----------------------|-------------------------|-------------------------|----------------|
|                                                | mean (95%CI)         |                         | mean difference (95%CI) | <i>P</i> value |
| Primary outcomes                               |                      |                         |                         |                |
| 120-days, mm                                   | 0.88 (0.82 to 0.94)  | 0.90 (0.83 to 0.96)     | -0.02 (-0.02 to -0.02)  | 0.677          |
| Absolute change from baseline to 120-days, mm  | 0.01 (-0.02 to 0.05) | 0.00 (-0.06 to 0.06)    | 0.02 (0.04 to 0.00)     | 0.783          |
| Percentage change from baseline to 120-days, % | 3.18 (-1.85 to 8.20) | 2.21 (-4.31 to 8.73)    | 0.97 (2.46 to -0.53)    | 0.765          |
| Average (Left and right) CIMT                  |                      |                         |                         |                |
| Baseline, mm                                   | 0.84 (0.79 to 0.89)  | 0.85 (0.80 to 0.91)     | -0.01 (-0.01 to -0.01)  | 0.754          |
| 120-days, mm                                   | 0.85 (0.80 to 0.90)  | 0.88 (0.83 to 0.93)     | -0.03 (-0.02 to -0.03)  | 0.502          |
| Absolute change from baseline to 120-days, mm  | 0.01 (-0.03 to 0.05) | 0.03 (-0.02 to 0.07)    | -0.01 (-0.01 to -0.02)  | 0.490          |
| Percentage change from baseline to 120-days, % | 3.44 (-2.05 to 8.92) | 4.88 (-0.57 to 10.32)   | -1.44 (-1.48 to -1.40)  | 0.493          |

Mean difference refers to the disparity between two groups. The difference is considered statistically significant when  $P < 0.05$ , denoted as \*; when  $P < 0.01$ , denoted as \*\*; and when  $P < 0.001$ , denoted as \*\*\*.

There were no significant differences between the two groups in terms of coagulation, liver function, renal function, blood glucose, blood routine, and physical examination (Supplement Table S4). At the 45-day intervention, there was a mean difference of 1.06 (1.05 to 1.07) in the absolute change of PT between the two groups.

## Supplement Table S4 Laboratory values and physical examination of interest

| Variables                                 | NMS ( <i>n</i> =55)    | Placebo ( <i>n</i> =58) | NMS vs. placebo         |                |
|-------------------------------------------|------------------------|-------------------------|-------------------------|----------------|
|                                           | mean (95%CI)           |                         | mean difference (95%CI) | <i>P</i> value |
| Coagulation                               |                        |                         |                         |                |
| PT, S                                     |                        |                         |                         |                |
| Baseline                                  | 10.35 (10.13 to 10.57) | 11.00 (10.37 to 11.64)  | -0.66 (-0.24 to -1.07)  | 0.454          |
| 45-days                                   | 11.63 (10.95 to 12.31) | 11.23 (10.92 to 11.53)  | 0.41 (0.03 to 0.78)     | 0.247          |
| Absolute change from baseline to 45-days  | 1.29 (0.63 to 1.94)    | 0.22 (-0.43 to 0.87)    | 1.06 (1.05 to 1.07)     | 0.019          |
| 120-days                                  | 12.28 (11.83 to 12.72) | 11.98 (11.41 to 12.54)  | 0.30 (0.43 to 0.17)     | 0.484          |
| Absolute change from baseline to 120-days | 1.89 (1.42 to 2.36)    | 0.93 (0.07 to 1.80)     | 0.96 (1.36 to 0.56)     | 0.128          |
| INR                                       |                        |                         |                         |                |
| Baseline                                  | 0.88 (0.85 to 0.91)    | 0.88 (0.85 to 0.90)     | 0.00 (0.00 to 0.01)     | 0.879          |
| 45-days                                   | 0.88 (0.86 to 0.90)    | 0.89 (0.87 to 0.92)     | -0.01 (-0.01 to -0.02)  | 0.268          |
| Absolute change from baseline to 45-days  | 0.00 (-0.03 to 0.02)   | 0.01 (0.00 to 0.03)     | -0.02 (-0.03 to -0.01)  | 0.381          |
| 120-days                                  | 0.89 (0.87 to 0.91)    | 0.89 (0.87 to 0.92)     | 0.00 (0.00 to -0.01)    | 0.730          |
| Absolute change from baseline to 120-days | 0.01 (-0.03 to 0.05)   | 0.02 (-0.01 to 0.04)    | -0.01 (-0.02 to 0.00)   | 0.596          |
| APTT, S                                   |                        |                         |                         |                |
| Baseline                                  | 30.91 (29.50 to 32.31) | 31.83 (30.15 to 33.51)  | -0.93 (-0.66 to -1.20)  | 0.807          |
| 45-days                                   | 31.53 (30.56 to 32.51) | 32.32 (30.64 to 34.01)  | -0.79 (-0.08 to -1.50)  | 0.956          |
| Absolute change from baseline to 45-days  | 0.63 (-0.84 to 2.09)   | 0.49 (-1.36 to 2.34)    | 0.14 (0.52 to -0.25)    | 0.863          |
| 120-days                                  | 32.29 (31.39 to 33.19) | 32.69 (31.49 to 33.90)  | -0.40 (-0.09 to -0.72)  | 0.707          |
| Absolute change from baseline to 120-days | 1.39 (0.11 to 2.67)    | 0.87 (-0.60 to 2.33)    | 0.52 (0.71 to 0.34)     | 0.910          |

| Variables                                 | NMS ( <i>n</i> =55)    | Placebo ( <i>n</i> =58) | NMS vs. placebo         |                |
|-------------------------------------------|------------------------|-------------------------|-------------------------|----------------|
|                                           | mean (95%CI)           |                         | mean difference (95%CI) | <i>P</i> value |
| Prothrombin time, S                       |                        |                         |                         |                |
| Baseline                                  | 10.85 (10.49 to 11.21) | 10.79 (10.50 to 11.08)  | 0.06 (-0.02 to 0.13)    | 0.879          |
| 45-days                                   | 10.87 (10.66 to 11.09) | 10.89 (10.43 to 11.36)  | -0.02 (0.23 to -0.27)   | 0.257          |
| Absolute change from baseline to 45-days  | 0.02 (-0.31 to 0.36)   | 0.10 (-0.31 to 0.51)    | -0.08 (-0.01 to -0.15)  | 0.408          |
| 120-days                                  | 10.97 (10.72 to 11.22) | 10.98 (10.68 to 11.29)  | -0.02 (0.04 to -0.07)   | 0.726          |
| Absolute change from baseline to 120-days | 0.13 (-0.31 to 0.57)   | 0.23 (-0.06 to 0.53)    | -0.10 (-0.25 to 0.04)   | 0.609          |
| FIB, g/L                                  |                        |                         |                         |                |
| Baseline                                  | 2.99 (2.83 to 3.15)    | 3.00 (2.79 to 3.20)     | -0.01 (0.03 to -0.04)   | 0.511          |
| 45-days                                   | 2.97 (2.47 to 3.46)    | 2.87 (2.65 to 3.08)     | 0.10 (-0.18 to 0.38)    | 0.529          |
| Absolute change from baseline to 45-days  | -0.02 (-0.52 to 0.48)  | -0.13 (-0.35 to 0.09)   | 0.11 (-0.18 to 0.39)    | 0.754          |
| 120-days                                  | 2.79 (2.65 to 2.92)    | 2.93 (2.58 to 3.27)     | -0.14 (0.07 to -0.35)   | 0.630          |
| Absolute change from baseline to 120-days | -0.18 (-0.34 to -0.02) | -0.05 (-0.39 to 0.29)   | -0.13 (0.05 to -0.32)   | 0.682          |
| Liver function                            |                        |                         |                         |                |
| Total bilirubin, µmol/L                   |                        |                         |                         |                |
| Baseline                                  | 17.79 (15.39 to 20.19) | 18.87 (16.43 to 21.30)  | -1.08 (-1.05 to -1.11)  | 0.453          |
| 45-days                                   | 18.16 (16.23 to 20.08) | 19.04 (16.85 to 21.22)  | -0.88 (-0.63 to -1.14)  | 0.796          |
| 120-days                                  | 16.18 (14.31 to 18.05) | 17.04 (14.86 to 19.22)  | -0.86 (-0.55 to -1.17)  | 0.886          |
| Direct bilirubin, µmol/L                  |                        |                         |                         |                |
| Baseline                                  | 3.53 (3.12 to 3.94)    | 4.05 (3.59 to 4.52)     | -0.53 (-0.47 to -0.59)  | 0.114          |
| 45-days                                   | 4.42 (4.04 to 4.80)    | 4.34 (3.90 to 4.77)     | 0.08 (0.13 to 0.03)     | 0.453          |
| 120-days                                  | 4.14 (3.77 to 4.51)    | 3.97 (3.60 to 4.34)     | 0.17 (0.16 to 0.17)     | 0.478          |
| Indirect bilirubin, µmol/L                |                        |                         |                         |                |
| Baseline                                  | 14.26 (12.07 to 16.45) | 14.81 (12.62 to 17.01)  | -0.55 (-0.55 to -0.55)  | 0.636          |
| 45-days                                   | 13.74 (12.12 to 15.35) | 14.70 (12.89 to 16.52)  | -0.97 (-0.76 to -1.17)  | 0.591          |
| 120-days                                  | 12.04 (10.46 to 13.62) | 13.07 (11.19 to 14.94)  | -1.03 (-0.73 to -1.32)  | 0.669          |
| ALT, U/L                                  |                        |                         |                         |                |
| Baseline                                  | 24.88 (20.75 to 29.01) | 28.05 (23.23 to 32.87)  | -3.17 (-2.48 to -3.86)  | 0.351          |
| 45-days                                   | 26.71 (23.25 to 30.17) | 29.78 (24.01 to 35.54)  | -3.07 (-0.76 to -5.37)  | 0.646          |
| 120-days                                  | 24.81 (21.29 to 28.33) | 25.37 (20.54 to 30.19)  | -0.56 (0.75 to -1.86)   | 0.662          |
| AST, U/L                                  |                        |                         |                         |                |
| Baseline                                  | 26.35 (22.11 to 30.58) | 26.01 (23.62 to 28.39)  | 0.34 (-1.51 to 2.19)    | 0.759          |
| 45-days                                   | 26.04 (23.93 to 28.14) | 26.99 (24.47 to 29.51)  | -0.95 (-0.54 to -1.36)  | 0.961          |
| 120-days                                  | 25.74 (23.48 to 28.01) | 24.69 (22.75 to 26.64)  | 1.05 (0.73 to 1.37)     | 0.571          |
| AST/ALT                                   |                        |                         |                         |                |
| Baseline                                  | 1.21 (1.09 to 1.34)    | 1.09 (0.99 to 1.18)     | 0.12 (0.09 to 0.16)     | 0.169          |
| 45-days                                   | 1.08 (0.99 to 1.17)    | 1.12 (1.02 to 1.23)     | -0.04 (-0.03 to -0.05)  | 0.513          |
| 120-days                                  | 1.18 (1.08 to 1.28)    | 1.16 (1.06 to 1.27)     | 0.02 (0.02 to 0.01)     | 0.742          |
| γ-GT, U/L                                 |                        |                         |                         |                |
| Baseline                                  | 36.01 (28.30 to 43.73) | 33.11 (26.87 to 39.35)  | 2.90 (1.43 to 4.38)     | 0.803          |
| 45-days                                   | 34.86 (28.05 to 41.67) | 36.48 (27.13 to 45.83)  | -1.62 (0.92 to -4.16)   | 0.868          |
| 120-days                                  | 33.45 (26.52 to 40.37) | 32.36 (26.25 to 38.47)  | 1.09 (0.27 to 1.90)     | 0.836          |
| ALP, U/L                                  |                        |                         |                         |                |
| Baseline                                  | 77.87 (70.02 to 85.73) | 80.25 (72.87 to 87.63)  | -2.38 (-2.86 to -1.90)  | 0.694          |
| 45-days                                   | 72.84 (66.22 to 79.46) | 80.53 (73.75 to 87.31)  | -7.69 (-7.52 to -7.85)  | 0.085          |
| 120-days                                  | 91.71 (84.76 to 98.65) | 96.57 (89.50 to 103.65) | -4.87 (-4.74 to -5.00)  | 0.327          |

| Variables                      | NMS ( <i>n</i> =55)       | Placebo ( <i>n</i> =58)   | NMS vs. placebo          |                |
|--------------------------------|---------------------------|---------------------------|--------------------------|----------------|
|                                | mean (95%CI)              |                           | mean difference (95%CI)  | <i>P</i> value |
| TP, g/L                        |                           |                           |                          |                |
| Baseline                       | 81.13 (80.26 to 82.00)    | 81.08 (80.03 to 82.13)    | 0.05 (0.24 to -0.13)     | 0.938          |
| 45-days                        | 75.28 (72.66 to 77.89)    | 77.78 (76.83 to 78.73)    | -2.50 (-4.17 to -0.84)   | 0.076          |
| 120-days                       | 78.58 (77.71 to 79.45)    | 79.67 (78.66 to 80.68)    | -1.09 (-0.96 to -1.23)   | 0.103          |
| ALB, g/L                       |                           |                           |                          |                |
| Baseline                       | 51.75 (51.21 to 52.28)    | 51.62 (51.05 to 52.19)    | 0.13 (0.16 to 0.09)      | 0.746          |
| 45-days                        | 47.21 (46.57 to 47.86)    | 47.73 (46.96 to 48.49)    | -0.51 (-0.39 to -0.63)   | 0.459          |
| 120-days                       | 48.73 (48.15 to 49.32)    | 49.01 (48.31 to 49.71)    | -0.28 (-0.17 to -0.40)   | 0.536          |
| GLB, g/L                       |                           |                           |                          |                |
| Baseline                       | 29.38 (28.56 to 30.20)    | 29.46 (28.55 to 30.36)    | -0.07 (0.01 to -0.16)    | 0.905          |
| 45-days                        | 29.37 (28.57 to 30.17)    | 30.05 (29.18 to 30.92)    | -0.68 (-0.61 to -0.75)   | 0.252          |
| 120-days                       | 29.84 (29.02 to 30.65)    | 30.66 (29.69 to 31.63)    | -0.82 (-0.67 to -0.97)   | 0.379          |
| ALB/GLB                        |                           |                           |                          |                |
| Baseline                       | 1.78 (1.73 to 1.84)       | 1.78 (1.72 to 1.84)       | 0.00 (0.01 to 0.00)      | 0.935          |
| 45-days                        | 1.63 (1.57 to 1.68)       | 1.61 (1.55 to 1.67)       | 0.02 (0.02 to 0.02)      | 0.714          |
| 120-days                       | 1.65 (1.59 to 1.70)       | 1.62 (1.56 to 1.68)       | 0.03 (0.03 to 0.02)      | 0.725          |
| Renal function                 |                           |                           |                          |                |
| Urea, mmol/L                   |                           |                           |                          |                |
| Baseline                       | 6.28 (5.72 to 6.85)       | 6.39 (5.98 to 6.81)       | -0.11 (-0.26 to 0.04)    | 0.760          |
| 45-days                        | 5.17 (4.73 to 5.62)       | 5.15 (4.76 to 5.54)       | 0.02 (-0.04 to 0.08)     | 0.890          |
| 120-days                       | 5.05 (4.67 to 5.43)       | 4.97 (4.56 to 5.37)       | 0.08 (0.11 to 0.06)      | 0.627          |
| Uric acid, $\mu$ mol/L         |                           |                           |                          |                |
| Baseline                       | 293.48 (266.70 to 320.27) | 287.11 (262.23 to 311.99) | 6.38 (4.47 to 8.28)      | 0.581          |
| 45-days                        | 274.17 (252.22 to 296.11) | 284.75 (261.25 to 308.25) | -10.58 (-9.03 to -12.14) | 0.827          |
| 120-days                       | 267.74 (244.66 to 290.82) | 269.59 (245.22 to 293.97) | -1.85 (-0.56 to -3.14)   | 0.783          |
| Blood glucose                  |                           |                           |                          |                |
| Fasting glucose, mmol/L        |                           |                           |                          |                |
| Baseline                       | 5.58 (5.14 to 6.02)       | 5.72 (5.29 to 6.15)       | -0.14 (-0.15 to -0.13)   | 0.498          |
| 45-days                        | 5.28 (4.86 to 5.70)       | 5.46 (5.02 to 5.91)       | -0.19 (-0.16 to -0.21)   | 0.352          |
| 120-days                       | 5.47 (5.00 to 5.94)       | 5.75 (5.26 to 6.24)       | -0.28 (-0.26 to -0.31)   | 0.153          |
| Blood routine                  |                           |                           |                          |                |
| White blood cell, $10^9$ /L    |                           |                           |                          |                |
| Baseline                       | 6.18 (5.77 to 6.58)       | 6.11 (5.79 to 6.44)       | 0.06 (-0.02 to 0.14)     | 1.000          |
| 45-days                        | 6.30 (5.86 to 6.73)       | 6.24 (5.77 to 6.70)       | 0.06 (0.09 to 0.03)      | 0.650          |
| 120-days                       | 6.07 (5.64 to 6.51)       | 6.08 (5.71 to 6.45)       | -0.01 (-0.08 to 0.06)    | 0.798          |
| ANC, $10^9$ /L                 |                           |                           |                          |                |
| Baseline                       | 3.54 (3.20 to 3.87)       | 3.56 (3.33 to 3.79)       | -0.03 (-0.12 to 0.07)    | 0.420          |
| 45-days                        | 3.68 (3.32 to 4.03)       | 3.61 (3.24 to 3.99)       | 0.07 (0.08 to 0.05)      | 0.781          |
| 120-days                       | 3.44 (3.10 to 3.77)       | 3.48 (3.20 to 3.76)       | -0.05 (-0.10 to 0.01)    | 0.473          |
| Neutrophil percentage, %       |                           |                           |                          |                |
| Baseline                       | 56.40 (54.26 to 58.53)    | 57.92 (56.15 to 59.68)    | -1.52 (-1.89 to -1.15)   | 0.275          |
| 45-days                        | 57.39 (55.26 to 59.52)    | 56.94 (54.97 to 58.91)    | 0.45 (0.29 to 0.61)      | 0.756          |
| 120-days                       | 55.68 (53.70 to 57.65)    | 56.66 (54.82 to 58.49)    | -0.98 (-1.12 to -0.84)   | 0.468          |
| Absolute lymphocyte, $10^9$ /L |                           |                           |                          |                |
| Baseline                       | 2.17 (2.01 to 2.32)       | 2.06 (1.92 to 2.19)       | 0.11 (0.09 to 0.13)      | 0.255          |
| 45-days                        | 2.15 (2.02 to 2.29)       | 2.13 (1.98 to 2.27)       | 0.03 (0.04 to 0.01)      | 0.411          |
| 120-days                       | 2.18 (2.04 to 2.33)       | 2.11 (1.99 to 2.24)       | 0.07 (0.05 to 0.09)      | 0.483          |

| Variables                                | NMS ( <i>n</i> =55)       | Placebo ( <i>n</i> =58)   | NMS vs. placebo         |                |
|------------------------------------------|---------------------------|---------------------------|-------------------------|----------------|
|                                          | mean (95%CI)              |                           | mean difference (95%CI) | <i>P</i> value |
| Lymphocyte percentage, %                 |                           |                           |                         |                |
| Baseline                                 | 35.93 (33.80 to 38.06)    | 33.91 (32.29 to 35.53)    | 2.02 (1.50 to 2.53)     | 0.134          |
| 45-days                                  | 35.27 (33.15 to 37.40)    | 34.99 (33.18 to 36.80)    | 0.28 (-0.03 to 0.60)    | 0.838          |
| 120-days                                 | 36.83 (34.82 to 38.83)    | 35.39 (33.65 to 37.12)    | 1.44 (1.16 to 1.72)     | 0.280          |
| AMC,10 <sup>9</sup> /L                   |                           |                           |                         |                |
| Baseline                                 | 0.34 (0.30 to 0.37)       | 0.35 (0.32 to 0.37)       | -0.01 (-0.02 to 0.00)   | 0.208          |
| 45-days                                  | 0.34 (0.31 to 0.37)       | 0.34 (0.31 to 0.36)       | 0.00 (-0.01 to 0.01)    | 0.698          |
| 120-days                                 | 0.32 (0.29 to 0.35)       | 0.33 (0.31 to 0.36)       | -0.01 (-0.02 to 0.00)   | 0.488          |
| Percentage sofmonocytes, %               |                           |                           |                         |                |
| Baseline                                 | 5.46 (5.07 to 5.86)       | 5.76 (5.42 to 6.11)       | -0.30 (-0.35 to -0.25)  | 0.147          |
| 45-days                                  | 5.38 (5.04 to 5.71)       | 5.53 (5.22 to 5.84)       | -0.15 (-0.17 to -0.13)  | 0.436          |
| 120-days                                 | 5.36 (4.98 to 5.73)       | 5.51 (5.23 to 5.79)       | -0.15 (-0.25 to -0.06)  | 0.248          |
| Eosinophil count,10 <sup>9</sup> /L      |                           |                           |                         |                |
| Baseline                                 | 0.11 (0.08 to 0.14)       | 0.12 (0.10 to 0.14)       | -0.01 (-0.01 to 0.00)   | 0.270          |
| 45-days                                  | 0.10 (0.08 to 0.12)       | 0.13 (0.10 to 0.16)       | -0.03 (-0.02 to -0.04)  | 0.186          |
| 120-days                                 | 0.11 (0.08 to 0.13)       | 0.12 (0.10 to 0.14)       | -0.01 (-0.02 to -0.01)  | 0.315          |
| Immature granulocyte, n                  |                           |                           |                         |                |
| Baseline                                 | 0.01 (0.01 to 0.01)       | 0.01 (0.01 to 0.01)       | 0.00 (0.00 to 0.00)     | 0.193          |
| 45-days                                  | 0.01 (0.01 to 0.01)       | 0.01 (0.01 to 0.02)       | 0.00 (0.00 to -0.01)    | 0.797          |
| 120-days                                 | 0.01 (0.00 to 0.01)       | 0.01 (0.01 to 0.01)       | 0.00 (0.00 to -0.01)    | 0.305          |
| Immature granulocyte percentage, %       |                           |                           |                         |                |
| Baseline                                 | 0.15 (0.11 to 0.19)       | 0.16 (0.12 to 0.20)       | -0.01 (-0.01 to -0.01)  | 0.809          |
| 45-days                                  | 0.18 (0.08 to 0.29)       | 0.15 (0.11 to 0.19)       | 0.03 (-0.03 to 0.10)    | 0.968          |
| 120-days                                 | 0.12 (0.10 to 0.14)       | 0.14 (0.10 to 0.19)       | -0.02 (0.00 to -0.05)   | 0.616          |
| Hemoglobin, g/L                          |                           |                           |                         |                |
| Baseline                                 | 144.85 (140.80 to 148.91) | 148.34 (144.62 to 152.07) | -3.49 (-3.82 to -3.16)  | 0.206          |
| 45-days                                  | 145.51 (141.79 to 149.23) | 146.10 (140.70 to 151.51) | -0.59 (1.09 to -2.28)   | 0.421          |
| 120-days                                 | 149.40 (145.80 to 153.00) | 150.40 (146.32 to 154.47) | -1.00 (-0.52 to -1.47)  | 0.714          |
| Mean hemoglobin, pg                      |                           |                           |                         |                |
| Baseline                                 | 31.13 (30.62 to 31.64)    | 31.17 (30.78 to 31.55)    | -0.04 (-0.16 to 0.09)   | 0.975          |
| 45-days                                  | 31.08 (30.63 to 31.53)    | 31.05 (30.61 to 31.49)    | 0.03 (0.02 to 0.05)     | 0.954          |
| 120-days                                 | 31.19 (30.76 to 31.63)    | 31.16 (30.69 to 31.63)    | 0.03 (0.06 to 0.00)     | 0.972          |
| Mean hemoglobin concentration, g/l       |                           |                           |                         |                |
| Baseline                                 | 331.85 (329.95 to 333.76) | 332.57 (331.10 to 334.04) | -0.71 (-1.14 to -0.28)  | 0.553          |
| 45-days                                  | 331.42 (330.03 to 332.81) | 332.40 (330.81 to 333.98) | -0.98 (-0.78 to -1.17)  | 0.067          |
| 120-days                                 | 332.44 (330.92 to 333.96) | 333.19 (331.44 to 334.94) | -0.75 (-0.52 to -0.99)  | 0.299          |
| Red blood cell count,10 <sup>12</sup> /L |                           |                           |                         |                |
| Baseline                                 | 4.66 (4.54 to 4.78)       | 4.76 (4.65 to 4.88)       | -0.11 (-0.11 to -0.10)  | 0.211          |
| 45-days                                  | 4.69 (4.58 to 4.80)       | 4.77 (4.65 to 4.89)       | -0.08 (-0.07 to -0.08)  | 0.339          |
| 120-days                                 | 4.79 (4.68 to 4.90)       | 4.83 (4.71 to 4.96)       | -0.04 (-0.03 to -0.06)  | 0.620          |
| Hematocrit, %                            |                           |                           |                         |                |
| Baseline                                 | 43.63 (42.48 to 44.79)    | 44.58 (43.50 to 45.67)    | -0.95 (-1.02 to -0.88)  | 0.230          |
| 45-days                                  | 43.87 (42.81 to 44.94)    | 44.47 (43.35 to 45.59)    | -0.60 (-0.54 to -0.65)  | 0.441          |
| 120-days                                 | 44.90 (43.87 to 45.92)    | 45.13 (43.96 to 46.30)    | -0.23 (-0.09 to -0.38)  | 0.766          |
| MCV, fL                                  |                           |                           |                         |                |
| Baseline                                 | 93.79 (92.45 to 95.13)    | 93.71 (92.63 to 94.79)    | 0.08 (-0.18 to 0.33)    | 0.623          |
| 45-days                                  | 93.77 (92.54 to 94.99)    | 91.85 (88.48 to 95.21)    | 1.92 (4.06 to -0.22)    | 0.509          |

| Variables                        | NMS ( <i>n</i> =55)       | Placebo ( <i>n</i> =58)   | NMS vs. placebo         |                |
|----------------------------------|---------------------------|---------------------------|-------------------------|----------------|
|                                  | mean (95%CI)              |                           | mean difference (95%CI) | <i>P</i> value |
| 120-days                         | 93.82 (92.65 to 94.99)    | 93.50 (92.32 to 94.67)    | 0.32 (0.33 to 0.32)     | 0.629          |
| RDW-CV, %                        |                           |                           |                         |                |
| Baseline                         | 13.41 (13.08 to 13.73)    | 13.31 (13.13 to 13.50)    | 0.09 (-0.05 to 0.23)    | 0.388          |
| 45-days                          | 13.28 (12.94 to 13.62)    | 13.27 (13.08 to 13.46)    | 0.01 (-0.15 to 0.16)    | 0.080          |
| 120-days                         | 12.99 (12.73 to 13.24)    | 13.19 (12.92 to 13.46)    | -0.20 (-0.18 to -0.22)  | 0.285          |
| PLT,10 <sup>9</sup> /L           |                           |                           |                         |                |
| Baseline                         | 226.40 (209.80 to 243.00) | 220.43 (204.98 to 235.88) | 5.97 (4.82 to 7.12)     | 0.482          |
| 45-days                          | 234.31 (216.46 to 252.16) | 222.88 (207.12 to 238.63) | 11.43 (9.33 to 13.53)   | 0.273          |
| 120-days                         | 227.24 (210.03 to 244.44) | 227.53 (212.01 to 243.06) | -0.30 (-1.98 to 1.38)   | 0.920          |
| PCT, %                           |                           |                           |                         |                |
| Baseline                         | 0.23 (0.21 to 0.25)       | 0.22 (0.21 to 0.24)       | 0.01 (0.00 to 0.01)     | 0.585          |
| 45-days                          | 0.24 (0.22 to 0.25)       | 0.23 (0.22 to 0.24)       | 0.01 (0.00 to 0.01)     | 0.425          |
| 120-days                         | 0.23 (0.22 to 0.25)       | 0.23 (0.22 to 0.24)       | 0.00 (0.00 to 0.01)     | 0.872          |
| MPV, fL                          |                           |                           |                         |                |
| Baseline                         | 10.25 (9.98 to 10.51)     | 10.39 (10.04 to 10.74)    | -0.15 (-0.06 to -0.23)  | 0.908          |
| 45-days                          | 10.15 (9.90 to 10.40)     | 10.27 (9.77 to 10.77)     | -0.12 (0.13 to -0.37)   | 0.650          |
| 120-days                         | 10.36 (10.08 to 10.64)    | 10.33 (9.98 to 10.69)     | 0.03 (0.11 to -0.04)    | 0.885          |
| PDW, fL                          |                           |                           |                         |                |
| Baseline                         | 16.25 (16.17 to 16.33)    | 16.28 (16.20 to 16.36)    | -0.03 (-0.03 to -0.03)  | 0.550          |
| 45-days                          | 16.22 (16.13 to 16.30)    | 16.29 (16.20 to 16.38)    | -0.07 (-0.06 to -0.08)  | 0.244          |
| 120-days                         | 16.30 (16.22 to 16.38)    | 16.27 (16.18 to 16.36)    | 0.03 (0.04 to 0.01)     | 0.645          |
| P-LCR,10 <sup>9</sup> /L         |                           |                           |                         |                |
| Baseline                         | 62.29 (57.40 to 67.18)    | 60.50 (56.64 to 64.36)    | 1.79 (0.76 to 2.82)     | 0.566          |
| 45-days                          | 62.29 (57.71 to 66.87)    | 61.69 (57.28 to 66.10)    | 0.60 (0.43 to 0.77)     | 0.711          |
| 120-days                         | 64.22 (59.03 to 69.40)    | 62.34 (58.08 to 66.61)    | 1.87 (0.95 to 2.80)     | 0.577          |
| Physical Examination of Interest |                           |                           |                         |                |
| BMI, kg/m <sup>2</sup>           |                           |                           |                         |                |
| Baseline                         | 26.17 (25.43 to 26.91)    | 26.61 (25.84 to 27.38)    | -0.44 (-0.41 to -0.47)  | 0.412          |
| 45-days                          | 26.27 (25.53 to 27.02)    | 26.65 (25.88 to 27.43)    | -0.38 (-0.35 to -0.41)  | 0.483          |
| 120-days                         | 26.38 (25.65 to 27.12)    | 26.66 (25.91 to 27.41)    | -0.28 (-0.26 to -0.29)  | 0.596          |
| SBP, mmHg                        |                           |                           |                         |                |
| Baseline                         | 132.09 (127.47 to 136.71) | 132.71 (127.98 to 137.43) | -0.62 (-0.51 to -0.72)  | 0.852          |
| 45-days                          | 130.16 (125.95 to 134.38) | 130.66 (125.92 to 135.39) | -0.49 (0.02 to -1.01)   | 0.877          |
| 120-days                         | 133.47 (129.23 to 137.71) | 133.90 (129.87 to 137.92) | -0.42 (-0.64 to -0.21)  | 0.885          |
| DBP, mmHg                        |                           |                           |                         |                |
| Baseline                         | 85.07 (82.15 to 87.99)    | 83.47 (80.71 to 86.22)    | 1.61 (1.44 to 1.77)     | 0.424          |
| 45-days                          | 84.56 (82.08 to 87.05)    | 84.14 (81.15 to 87.12)    | 0.43 (0.93 to -0.08)    | 0.861          |
| 120-days                         | 84.89 (82.44 to 87.34)    | 83.66 (81.19 to 86.12)    | 1.24 (1.25 to 1.22)     | 0.477          |
| Waist-hip ratio                  |                           |                           |                         |                |
| Baseline                         | 93.54 (92.09 to 94.99)    | 94.18 (92.53 to 95.83)    | -0.64 (-0.44 to -0.84)  | 0.561          |
| 45-days                          | 91.49 (90.05 to 92.93)    | 91.45 (90.11 to 92.78)    | 0.05 (-0.06 to 0.15)    | 0.982          |
| 120-days                         | 90.77 (89.06 to 92.48)    | 90.56 (88.89 to 92.23)    | 0.21 (0.17 to 0.26)     | 0.859          |

*P* value means the comparison of the two groups in the same period; PT: prothrombin time, INR: international normalized ratio, APTT: activated partial prothrombin time, FIB: Fibrinogen, AST: aspartate aminotransferase, ALT: alanine aminotransferase,  $\gamma$ -GT:  $\gamma$ -glutamyl transpeptidase, ALP: alkaline phosphatase, TP: total protein, ALB: albumin, GLB: globulin, ANC: absolute neutrophil count, AMC:

absolute monocyte count, MCV: mean corpuscular volume, RDW-CV: red blood cell volume distribution width coefficient of variation, PLT: platelet, PDW: Platelet distribution width, MPV: mean platelet volume, PCT: MPV\*PDW, P-LCR: platelet-large cell ratio; BMI: body mass index, SBP: systolic blood pressure, DBP: diastolic blood pressure.

At baseline, there were no significant differences in the consumption of milk, dairy and soy nuts products, plant foods, cereals and potatoes, vegetables, fruit, and metabolic levels between the two groups. These similarities persisted at the 45-day and 120-day marks (Supplement Table S5).

**Supplement Table S5 Dietary intakes and metabolic levels at baseline, 45-days, and 120-days**

| Variables                                    | NMS (n=56)                   | Placebo (n=58)               | NMS vs. placebo           |         |
|----------------------------------------------|------------------------------|------------------------------|---------------------------|---------|
|                                              | mean (95%CI)                 |                              | mean difference (95%CI)   | P value |
| Milk, dairy and soy nuts products, times/day |                              |                              |                           |         |
| Baseline                                     | 0.80 (0.58 to 1.03)          | 0.76 (0.58 to 0.94)          | 0.04 (-0.01 to 0.09)      | 0.724   |
| 45-days                                      | 1.00 (0.73 to 1.27)          | 0.81 (0.63 to 0.99)          | 0.19 (0.10 to 0.27)       | 0.633   |
| 120-days                                     | 1.09 (0.83 to 1.35)          | 0.87 (0.69 to 1.05)          | 0.22 (0.14 to 0.30)       | 0.448   |
| Animal foods, times/day                      |                              |                              |                           |         |
| Baseline                                     | 1.22 (0.95 to 1.48)          | 1.34 (1.06 to 1.63)          | -0.13 (-0.11 to -0.15)    | 0.609   |
| 45-days                                      | 1.18 (0.94 to 1.41)          | 1.29 (1.01 to 1.57)          | -0.12 (-0.07 to -0.16)    | 0.841   |
| 120-days                                     | 1.37 (1.08 to 1.65)          | 1.30 (1.05 to 1.56)          | 0.06 (0.03 to 0.09)       | 0.743   |
| Plant foods, times/day                       |                              |                              |                           |         |
| Baseline                                     | 7.37 (6.58 to 8.16)          | 7.38 (6.73 to 8.03)          | -0.01 (-0.15 to 0.12)     | 0.886   |
| 45-days                                      | 6.91 (6.15 to 7.66)          | 6.77 (6.07 to 7.47)          | 0.14 (0.09 to 0.19)       | 0.788   |
| 120-days                                     | 6.56 (5.92 to 7.20)          | 6.73 (6.17 to 7.28)          | -0.16 (-0.24 to -0.08)    | 0.483   |
| Cereals and potatoes, times/day              |                              |                              |                           |         |
| Baseline                                     | 3.70 (3.35 to 4.05)          | 3.49 (3.22 to 3.76)          | 0.21 (0.13 to 0.29)       | 0.499   |
| 45-days                                      | 3.50 (3.16 to 3.83)          | 3.21 (2.93 to 3.49)          | 0.29 (0.23 to 0.35)       | 0.411   |
| 120-days                                     | 3.29 (3.00 to 3.57)          | 3.14 (2.89 to 3.40)          | 0.14 (0.11 to 0.17)       | 0.639   |
| Vegetables and fruit, times/day              |                              |                              |                           |         |
| Baseline                                     | 3.67 (3.07 to 4.26)          | 3.89 (3.38 to 4.40)          | -0.22 (-0.31 to -0.14)    | 0.629   |
| 45-days                                      | 3.41 (2.79 to 4.03)          | 3.56 (3.03 to 4.10)          | -0.15 (-0.23 to -0.07)    | 0.514   |
| 120-days                                     | 3.28 (2.80 to 3.76)          | 3.58 (3.11 to 4.05)          | -0.30 (-0.31 to -0.29)    | 0.274   |
| Metabolic level, kcal                        |                              |                              |                           |         |
| Baseline                                     | 2132.78 (1880.76 to 2384.79) | 1954.52 (1785.49 to 2123.56) | 178.25 (95.27 to 261.23)  | 0.526   |
| 45-days                                      | 2142.08 (1886.74 to 2397.41) | 1959.50 (1788.66 to 2130.34) | 182.57 (98.08 to 267.07)  | 0.579   |
| 120-days                                     | 2170.68 (1921.59 to 2419.76) | 1959.42 (1789.32 to 2129.53) | 211.26 (132.28 to 290.23) | 0.369   |

P value means the comparison of the two groups in the same period; Metabolic level: weight \* MET\*24h, Calculated as physical activity level based on MET (exercise equivalents), referring to the 2011 Japanese exercise standard: sleeping for 1 MET; eating for 1.5 METS; computer for 1.5 METS; TV for 1.0 METS; resting for 1.3 METS; housework for 2.0 METS; light standing work for 2.3 METS; medium-heavy standing

work for 4.5 METS; light walking work for 3.5 METS; moderate-heavy walking for 4.5 METS; cycling for 3.5 METS; driving for 1.5 METS; ; dancing for 7 METSs; other moderate physical activity for 5 METS.

In patients with borderline mixed hyperlipidemia, for TC values ranging from 5.2 to 6.2 and TG values from 1.7 to 2.3, the findings were in line with prior analyses. However, there were exceptions: TC initial values varied at the first follow-up, and while TG raw values, the differences and percentages showed variation (Supplement Table S6).

## Supplement Table S6 Primary and second outcomes in the borderline hyperlipidaemia.

| End outcomes                                      | NMS (n=26)<br>mean (95%CI) | Placebo (n=21)          | NMS vs. placebo<br>mean difference<br>(95%CI) | P value |
|---------------------------------------------------|----------------------------|-------------------------|-----------------------------------------------|---------|
| Primary outcomes                                  |                            |                         |                                               |         |
| TC                                                |                            |                         |                                               |         |
| Baseline, mmol/L                                  | 5.86 (5.64 to 6.08)        | 5.60 (5.21 to 6.00)     | 0.25 (0.44 to 0.07)                           | 0.700   |
| 45-days, mmol/L                                   | 4.90 (4.65 to 5.15) ***    | 5.20 (4.87 to 5.52) **  | -0.30 (-0.22 to -0.37)                        | 0.141   |
| Absolute change from baseline to 45-days, mmol/L  | -0.96 (-1.20 to -0.72)     | -0.41 (-0.70 to -0.11)  | -0.55 (-0.50 to -0.60)                        | 0.004   |
| Percentage change from baseline to 45-days, %     | -16.11 (-19.92 to -12.31)  | -6.24 (-11.26 to -1.22) | -9.87 (-8.66 to -11.08)                       | 0.002   |
| 120-days, mmol/L                                  | 4.94 (4.66 to 5.23) ***    | 5.41 (5.08 to 5.73)     | -0.46 (-0.42 to -0.51)                        | 0.032   |
| Absolute change from baseline to 120-days, mmol/L | -0.91 (-1.16 to -0.67)     | -0.20 (-0.44 to 0.05)   | -0.72 (-0.72 to -0.71)                        | <0.001  |
| Percentage change from baseline to 120-days, %    | -15.50 (-19.36 to -11.64)  | -2.66 (-7.08 to 1.77)   | -12.84 (-12.28 to -13.40)                     | <0.001  |
| TG                                                |                            |                         |                                               |         |
| Baseline, mmol/L                                  | 2.21 (1.91 to 2.51)        | 2.01 (1.77 to 2.26)     | 0.20 (0.14 to 0.25)                           | 0.608   |
| 45-days, mmol/L                                   | 1.61 (1.33 to 1.89) ***    | 1.83 (1.52 to 2.13)     | -0.22 (-0.19 to -0.24)                        | 0.227   |
| Absolute change from baseline to 45-days, mmol/L  | -0.60 (-0.89 to -0.30)     | -0.19 (-0.45 to 0.08)   | -0.41 (-0.44 to -0.38)                        | 0.036   |
| Percentage change from baseline to 45-days, %     | -24.67 (-35.33 to -14.00)  | -6.91 (-20.42 to 6.61)  | -17.76 (-14.91 to -20.61)                     | 0.025   |
| 120-days, mmol/L                                  | 1.63 (1.41 to 1.85) ***    | 1.93 (1.71 to 2.14)     | -0.29 (-0.30 to -0.29)                        | 0.051   |
| Absolute change from baseline to 120-days, mmol/L | -0.58 (-0.86 to -0.29)     | -0.08 (-0.30 to 0.13)   | -0.49 (-0.56 to -0.42)                        | 0.010   |
| Percentage change from baseline to 120-days, %    | -22.35 (-32.69 to -12.00)  | 1.00 (-15.43 to 17.44)  | -23.35 (-17.26 to -29.44)                     | 0.010   |
| LDL-C                                             |                            |                         |                                               |         |
| Baseline, mmol/L                                  | 3.64 (3.49 to 3.79)        | 3.49 (3.16 to 3.82)     | 0.15 (0.32 to -0.03)                          | 0.764   |
| 45-days, mmol/L                                   | 3.01 (2.83 to 3.19) ***    | 3.40 (3.13 to 3.67)     | -0.39 (-0.29 to -0.48)                        | 0.018   |
| Absolute change from baseline to 45-days, mmol/L  | -0.63 (-0.79 to -0.47)     | -0.09 (-0.26 to 0.08)   | -0.53 (-0.53 to -0.54)                        | <0.001  |
| Percentage change from baseline to 45-days, %     | -17.08 (-21.23 to -12.94)  | -1.14 (-6.44 to 4.16)   | -15.95 (-14.79 to -17.10)                     | <0.001  |
| 120-days, mmol/L                                  | 3.14 (2.91 to 3.36) ***    | 3.59 (3.29 to 3.89)     | -0.45 (-0.39 to -0.52)                        | 0.016   |
| Absolute change from baseline to 120-days, mmol/L | -0.50 (-0.71 to -0.29)     | 0.10 (-0.10 to 0.30)    | -0.60 (-0.61 to -0.59)                        | <0.001  |
| Percentage change from baseline to 120-days, %    | -13.65 (-19.19 to -8.12)   | 4.43 (-1.54 to 10.40)   | -18.08 (-17.64 to -18.52)                     | <0.001  |
| non-HDL-C                                         |                            |                         |                                               |         |
| Baseline, mmol/L                                  | 4.38 (4.16 to 4.59)        | 4.21 (3.84 to 4.57)     | 0.17 (0.32 to 0.02)                           | 0.417   |
| 45-days, mmol/L                                   | 3.38 (3.15 to 3.61) ***    | 3.82 (3.52 to 4.11) **  | -0.44 (-0.38 to -0.50)                        | 0.019   |

| End outcomes                                      | NMS (n=26)                | Placebo (n=21)          | NMS vs. placebo           |         |
|---------------------------------------------------|---------------------------|-------------------------|---------------------------|---------|
|                                                   | mean (95%CI)              |                         | mean difference (95%CI)   | P value |
| Absolute change from baseline to 45-days, mmol/L  | -1.00 (-1.21 to -0.79)    | -0.39 (-0.64 to -0.14)  | -0.61 (-0.57 to -0.64)    | <0.001  |
| Percentage change from baseline to 45-days, %     | -22.61 (-26.99 to -18.23) | -7.89 (-13.55 to -2.23) | -14.72 (-13.44 to -16.00) | <0.001  |
| 120-days, mmol/L                                  | 3.34 (3.08 to 3.61) ***   | 3.89 (3.60 to 4.19) *   | -0.55 (-0.52 to -0.58)    | 0.007   |
| Absolute change from baseline to 120-days, mmol/L | -1.03 (-1.27 to -0.79)    | -0.32 (-0.56 to -0.07)  | -0.72 (-0.71 to -0.72)    | <0.001  |
| Percentage change from baseline to 120-days, %    | -23.47 (-28.33 to -18.61) | -6.10 (-11.74 to -0.45) | -17.37 (-16.59 to -18.16) | <0.001  |
| LDL-C to HDL-C ratio                              |                           |                         |                           |         |
| Baseline                                          | 2.54 (2.32 to 2.76)       | 2.61 (2.23 to 2.99)     | -0.07 (0.09 to -0.24)     | 0.874   |
| 45-days                                           | 2.04 (1.85 to 2.23) ***   | 2.57 (2.22 to 2.93)     | -0.54 (-0.37 to -0.70)    | 0.009   |
| Absolute change from baseline to 45-days          | -0.50 (-0.60 to -0.41)    | -0.04 (-0.15 to 0.08)   | -0.46 (-0.45 to -0.48)    | <0.001  |
| Percentage change from baseline to 45-days, %     | -19.70 (-23.11 to -16.28) | -0.11 (-4.97 to 4.75)   | -19.59 (-18.14 to -21.04) | <0.001  |
| 120-days                                          | 2.02 (1.82 to 2.22) ***   | 2.47 (2.15 to 2.80)     | -0.45 (-0.33 to -0.58)    | 0.011   |
| Absolute change from baseline to 120-days         | -0.52 (-0.65 to -0.39)    | -0.14 (-0.33 to 0.05)   | -0.38 (-0.32 to -0.44)    | 0.001   |
| Percentage change from baseline to 120-days, %    | -20.38 (-25.17 to -15.60) | -3.12 (-9.96 to 3.72)   | -17.26 (-15.20 to -19.32) | <0.001  |
| HDL-C                                             |                           |                         |                           |         |
| Baseline, mmol/L                                  | 1.48 (1.37 to 1.60)       | 1.40 (1.26 to 1.53)     | 0.09 (0.11 to 0.07)       | 0.322   |
| 45-days, mmol/L                                   | 1.52 (1.41 to 1.64)       | 1.38 (1.24 to 1.52)     | 0.14 (0.17 to 0.12)       | 0.106   |
| Absolute change from baseline to 45-days, mmol/L  | 0.04 (-0.01 to 0.10)      | -0.02 (-0.10 to 0.07)   | 0.06 (0.09 to 0.03)       | 0.256   |
| Percentage change from baseline to 45-days, %     | 3.38 (-0.36 to 7.12)      | -0.41 (-5.93 to 5.11)   | 3.79 (5.57 to 2.01)       | 0.202   |
| 120-days, mmol/L                                  | 1.60 (1.49 to 1.71) ***   | 1.51 (1.37 to 1.66) **  | 0.09 (0.12 to 0.05)       | 0.336   |
| Absolute change from baseline to 120-days, mmol/L | 0.12 (0.08 to 0.16)       | 0.12 (0.03 to 0.20)     | 0.00 (0.04 to -0.04)      | 0.764   |
| Percentage change from baseline to 120-days, %    | 8.58 (5.49 to 11.68)      | 9.17 (3.12 to 15.22)    | -0.59 (2.36 to -3.54)     | 0.864   |
| Second outcomes                                   |                           |                         |                           |         |
| Right CIMT                                        |                           |                         |                           |         |
| Baseline, mm                                      | 0.76 (0.69 to 0.83)       | 0.79 (0.70 to 0.89)     | -0.03 (-0.01 to -0.06)    | 0.712   |
| 120-days, mm                                      | 0.81 (0.75 to 0.87)       | 0.77 (0.70 to 0.85)     | 0.04 (0.05 to 0.03)       | 0.351   |
| Absolute change from baseline to 120-days, mm     | 0.05 (-0.02 to 0.12)      | -0.02 (-0.10 to 0.06)   | 0.07 (0.08 to 0.07)       | 0.080   |
| Percentage change from baseline to 120-days, %    | 12.06 (-3.42 to 27.54)    | 1.39 (-9.94 to 12.71)   | 10.68 (6.53 to 14.83)     | 0.078   |
| Left CIMT                                         |                           |                         |                           |         |
| Baseline, mm                                      | 0.87 (0.79 to 0.96)       | 0.88 (0.77 to 1.00)     | -0.01 (0.02 to -0.04)     | 0.837   |
| 120-days, mm                                      | 0.89 (0.81 to 0.97)       | 0.86 (0.75 to 0.96)     | 0.03 (0.05 to 0.01)       | 0.627   |
| Absolute change from baseline to 120-days, mm     | 0.02 (-0.03 to 0.06)      | -0.02 (-0.07 to 0.02)   | 0.04 (0.04 to 0.04)       | 0.322   |
| Percentage change from baseline to 120-days, %    | 2.77 (-2.93 to 8.48)      | -1.49 (-6.57 to 3.60)   | 4.26 (3.64 to 4.88)       | 0.336   |
| Average (Left and right) CIMT                     |                           |                         |                           |         |
| Baseline, mm                                      | 0.82 (0.75 to 0.88)       | 0.84 (0.74 to 0.93)     | -0.02 (0.01 to -0.05)     | 0.863   |
| 120-days, mm                                      | 0.85 (0.78 to 0.91)       | 0.81 (0.73 to 0.90)     | 0.03 (0.05 to 0.02)       | 0.539   |
| Absolute change from baseline to 120-days, mm     | 0.03 (-0.02 to 0.08)      | -0.02 (-0.07 to 0.03)   | 0.05 (0.05 to 0.05)       | 0.154   |
| Percentage change from baseline to 120-days, %    | 4.86 (-1.80 to 11.52)     | -1.38 (-6.83 to 4.07)   | 6.24 (5.03 to 7.46)       | 0.161   |

Mean difference refers to the disparity between two groups. The difference is considered statistically significant when  $P < 0.05$ , denoted as \*; when  $P < 0.01$ , denoted as \*\*; and when  $P < 0.001$ , denoted as \*\*\*.

Subgroup analyses by age for those aged 30-60 years, those aged 60 years and older were generally consistent with the previous results (Supplement Table S7).



# Supplement Table S7 Primary and second outcomes for those aged 30-60 and over

60 years

| End outcomes                                      | NMS                        | Placebo                   | NMS vs. placebo           |         |
|---------------------------------------------------|----------------------------|---------------------------|---------------------------|---------|
|                                                   | mean (95%CI)               |                           | mean difference (95%CI)   | P value |
| 30-60 years                                       | NMS (n=26)                 | Placebo (n=26)            |                           |         |
| Primary outcomes                                  |                            |                           |                           |         |
| TC                                                |                            |                           |                           |         |
| Baseline, mmol/L                                  | 6.00 (5.72 to 6.28)        | 5.93 (5.65 to 6.22)       | 0.07 (0.07 to 0.07)       | 0.729   |
| 45-days, mmol/L                                   | 4.88 (4.57 to 5.19)        | 5.42 (5.18 to 5.67)       | -0.54 (-0.60 to -0.48)    | 0.007   |
| Absolute change from baseline to 45-days, mmol/L  | -1.11 (-1.46 to -0.77) *** | -0.51 (-0.82 to -0.20) ** | -0.61 (-0.64 to -0.57)    | 0.009   |
| Percentage change from baseline to 45-days, %     | -18.00 (-23.23 to -12.77)  | -7.70 (-12.64 to -2.76)   | -10.30 (-10.59 to -10.02) | 0.005   |
| 120-days, mmol/L                                  | 5.12 (4.79 to 5.45) ***    | 5.64 (5.42 to 5.86) *     | -0.52 (-0.63 to -0.41)    | 0.010   |
| Absolute change from baseline to 120-days, mmol/L | -0.88 (-1.16 to -0.60)     | -0.29 (-0.55 to -0.04)    | -0.59 (-0.61 to -0.56)    | 0.003   |
| Percentage change from baseline to 120-days, %    | -14.41 (-19.09 to -9.73)   | -4.21 (-8.20 to -0.22)    | -10.20 (-10.88 to -9.52)  | 0.001   |
| TG                                                |                            |                           |                           |         |
| Baseline, mmol/L                                  | 2.51 (2.20 to 2.82)        | 2.72 (2.34 to 3.09)       | -0.20 (-0.14 to -0.27)    | 0.355   |
| 45-days, mmol/L                                   | 1.95 (1.60 to 2.30) **     | 2.24 (1.92 to 2.55) *     | -0.29 (-0.32 to -0.26)    | 0.138   |
| Absolute change from baseline to 45-days, mmol/L  | -0.56 (-0.98 to -0.15)     | -0.48 (-0.85 to -0.11)    | -0.08 (-0.13 to -0.04)    | 0.757   |
| Percentage change from baseline to 45-days, %     | -16.96 (-37.61 to 3.70)    | -12.87 (-26.63 to 0.88)   | -4.08 (-10.98 to 2.82)    | 0.223   |
| 120-days, mmol/L                                  | 1.96 (1.63 to 2.29) **     | 2.33 (2.06 to 2.59) **    | -0.37 (-0.43 to -0.30)    | 0.041   |
| Absolute change from baseline to 120-days, mmol/L | -0.55 (-0.97 to -0.13)     | -0.39 (-0.68 to -0.10)    | -0.16 (-0.29 to -0.03)    | 0.305   |
| Percentage change from baseline to 120-days, %    | -15.67 (-35.99 to 4.64)    | -9.90 (-19.77 to -0.03)   | -5.78 (-16.22 to 4.67)    | 0.140   |
| LDL-C                                             |                            |                           |                           |         |
| Baseline, mmol/L                                  | 3.71 (3.52 to 3.91)        | 3.66 (3.45 to 3.87)       | 0.05 (0.07 to 0.03)       | 0.720   |
| 45-days, mmol/L                                   | 2.99 (2.71 to 3.27) ***    | 3.52 (3.35 to 3.68)       | -0.53 (-0.64 to -0.42)    | 0.002   |
| Absolute change from baseline to 45-days, mmol/L  | -0.73 (-0.95 to -0.50)     | -0.15 (-0.31 to 0.01)     | -0.58 (-0.64 to -0.51)    | <0.001  |
| Percentage change from baseline to 45-days, %     | -19.57 (-25.52 to -13.63)  | -3.15 (-7.53 to 1.23)     | -16.43 (-17.99 to -14.87) | <0.001  |
| 120-days, mmol/L                                  | 3.27 (2.99 to 3.55) ***    | 3.80 (3.61 to 3.98)       | -0.53 (-0.62 to -0.43)    | 0.003   |
| Absolute change from baseline to 120-days, mmol/L | -0.44 (-0.65 to -0.24)     | 0.13 (-0.02 to 0.29)      | -0.58 (-0.62 to -0.53)    | <0.001  |
| Percentage change from baseline to 120-days, %    | -12.04 (-17.40 to -6.67)   | 4.43 (0.12 to 8.73)       | -16.46 (-17.52 to -15.41) | <0.001  |
| non-HDL-C                                         |                            |                           |                           |         |
| Baseline, mmol/L                                  | 4.54 (4.27 to 4.80)        | 4.55 (4.28 to 4.83)       | -0.02 (-0.01 to -0.02)    | 0.926   |
| 45-days, mmol/L                                   | 3.42 (3.08 to 3.76) ***    | 4.09 (3.86 to 4.32) **    | -0.67 (-0.78 to -0.55)    | 0.002   |
| Absolute change from baseline to 45-days, mmol/L  | -1.11 (-1.44 to -0.79)     | -0.46 (-0.74 to -0.19)    | -0.65 (-0.70 to -0.60)    | 0.003   |
| Percentage change from baseline to 45-days, %     | -24.11 (-31.07 to -17.15)  | -8.95 (-14.83 to -3.07)   | -15.16 (-16.24 to -14.08) | 0.001   |
| 120-days, mmol/L                                  | 3.59 (3.26 to 3.92) ***    | 4.18 (3.99 to 4.37) **    | -0.59 (-0.73 to -0.46)    | 0.003   |
| Absolute change from baseline to 120-days, mmol/L | -0.95 (-1.23 to -0.67)     | -0.37 (-0.61 to -0.14)    | -0.58 (-0.63 to -0.53)    | 0.002   |
| Percentage change from baseline to 120-days, %    | -20.58 (-26.83 to -14.32)  | -7.11 (-11.70 to -2.51)   | -13.47 (-15.13 to -11.81) | 0.001   |
| LDL-C to HDL-C ratio                              |                            |                           |                           |         |
| Baseline                                          | 2.66 (2.37 to 2.94)        | 2.74 (2.46 to 3.02)       | -0.08 (-0.08 to -0.08)    | 0.751   |
| 45-days                                           | 2.16 (1.84 to 2.49) ***    | 2.70 (2.45 to 2.95)       | -0.54 (-0.61 to -0.47)    | 0.002   |

| End outcomes                                      | NMS                       | Placebo                | NMS vs. placebo           |         |
|---------------------------------------------------|---------------------------|------------------------|---------------------------|---------|
|                                                   | mean (95%CI)              |                        | mean difference (95%CI)   | P value |
| Absolute change from baseline to 45-days          | -0.49 (-0.62 to -0.37)    | -0.03 (-0.11 to 0.04)  | -0.46 (-0.51 to -0.41)    | <0.001  |
| Percentage change from baseline to 45-days, %     | -20.03 (-25.60 to -14.47) | -0.58 (-3.57 to 2.41)  | -19.46 (-22.04 to -16.88) | <0.001  |
| 120-days                                          | 2.24 (1.93 to 2.55) ***   | 2.66 (2.44 to 2.89)    | -0.42 (-0.51 to -0.34)    | 0.003   |
| Absolute change from baseline to 120-days         | -0.42 (-0.56 to -0.27)    | -0.07 (-0.20 to 0.05)  | -0.34 (-0.37 to -0.32)    | 0.001   |
| Percentage change from baseline to 120-days, %    | -16.14 (-21.41 to -10.88) | -1.48 (-5.20 to 2.23)  | -14.66 (-16.21 to -13.11) | <0.001  |
| HDL-C                                             |                           |                        |                           |         |
| Baseline, mmol/L                                  | 1.46 (1.33 to 1.60)       | 1.38 (1.29 to 1.47)    | 0.09 (0.04 to 0.13)       | 0.332   |
| 45-days, mmol/L                                   | 1.46 (1.34 to 1.58)       | 1.33 (1.26 to 1.41)    | 0.13 (0.09 to 0.17)       | 0.167   |
| Absolute change from baseline to 45-days, mmol/L  | 0.00 (-0.04 to 0.04)      | -0.04 (-0.09 to 0.01)  | 0.04 (0.05 to 0.03)       | 0.193   |
| Percentage change from baseline to 45-days, %     | 0.55 (-2.26 to 3.37)      | -2.60 (-5.70 to 0.51)  | 3.15 (3.44 to 2.87)       | 0.161   |
| 120-days, mmol/L                                  | 1.53 (1.41 to 1.66) **    | 1.46 (1.37 to 1.55) *  | 0.07 (0.04 to 0.10)       | 0.735   |
| Absolute change from baseline to 120-days, mmol/L | 0.07 (0.03 to 0.11)       | 0.08 (0.02 to 0.14)    | -0.01 (0.01 to -0.04)     | 0.702   |
| Percentage change from baseline to 120-days, %    | 5.21 (2.36 to 8.05)       | 6.51 (1.93 to 11.09)   | -1.30 (0.43 to -3.04)     | 0.621   |
| Second outcomes                                   |                           |                        |                           |         |
| Right CIMT                                        |                           |                        |                           |         |
| Baseline, mm                                      | 0.84 (0.76 to 0.91)       | 0.73 (0.66 to 0.80)    | 0.11 (0.11 to 0.12)       | 0.023   |
| 120-days, mm                                      | 0.83 (0.76 to 0.89)       | 0.77 (0.71 to 0.84)    | 0.05 (0.06 to 0.05)       | 0.145   |
| Absolute change from baseline to 120-days, mm     | -0.01 (-0.05 to 0.02)     | 0.05 (-0.02 to 0.11)   | -0.06 (-0.03 to -0.09)    | 0.127   |
| Percentage change from baseline to 120-days, %    | -0.22 (-4.40 to 3.95)     | 9.26 (0.05 to 18.47)   | -9.48 (-4.45 to -14.51)   | 0.144   |
| Left CIMT                                         |                           |                        |                           |         |
| Baseline, mm                                      | 0.87 (0.78 to 0.96)       | 0.80 (0.71 to 0.90)    | 0.07 (0.07 to 0.06)       | 0.229   |
| 120-days, mm                                      | 0.88 (0.79 to 0.97)       | 0.81 (0.73 to 0.89)    | 0.07 (0.06 to 0.07)       | 0.294   |
| Absolute change from baseline to 120-days, mm     | 0.01 (-0.03 to 0.05)      | 0.01 (-0.06 to 0.07)   | 0.00 (0.03 to -0.03)      | 0.952   |
| Percentage change from baseline to 120-days, %    | 1.69 (-3.45 to 6.82)      | 3.86 (-4.83 to 12.54)  | -2.17 (1.38 to -5.72)     | 0.904   |
| Average (Left and right) CIMT                     |                           |                        |                           |         |
| Baseline, mm                                      | 0.85 (0.78 to 0.93)       | 0.77 (0.69 to 0.84)    | 0.09 (0.09 to 0.09)       | 0.084   |
| 120-days, mm                                      | 0.85 (0.78 to 0.92)       | 0.79 (0.72 to 0.86)    | 0.06 (0.06 to 0.06)       | 0.224   |
| Absolute change from baseline to 120-days, mm     | -0.01 (-0.03 to 0.02)     | 0.03 (-0.02 to 0.08)   | -0.03 (-0.01 to -0.06)    | 0.588   |
| Percentage change from baseline to 120-days, %    | -0.04 (-3.06 to 2.98)     | 5.17 (-2.09 to 12.42)  | -5.21 (-0.98 to -9.44)    | 0.583   |
| Over 60 years                                     | NMS (n=29)                | Placebo (n=32)         |                           |         |
| Primary outcomes                                  |                           |                        |                           |         |
| TC                                                |                           |                        |                           |         |
| Baseline, mmol/L                                  | 5.97 (5.64 to 6.31)       | 5.80 (5.41 to 6.18)    | 0.17 (0.22 to 0.13)       | 0.398   |
| 45-days, mmol/L                                   | 5.22 (4.97 to 5.48) ***   | 5.61 (5.36 to 5.86)    | -0.39 (-0.39 to -0.38)    | 0.031   |
| Absolute change from baseline to 45-days, mmol/L  | -0.75 (-1.03 to -0.47)    | -0.19 (-0.45 to 0.08)  | -0.56 (-0.58 to -0.54)    | 0.004   |
| Percentage change from baseline to 45-days, %     | -11.83 (-15.94 to -7.73)  | -1.71 (-6.06 to 2.64)  | -10.12 (-9.88 to -10.36)  | 0.001   |
| 120-days, mmol/L                                  | 5.17 (4.84 to 5.50) ***   | 5.46 (5.21 to 5.72) *  | -0.29 (-0.37 to -0.22)    | 0.155   |
| Absolute change from baseline to 120-days, mmol/L | -0.80 (-1.08 to -0.53)    | -0.34 (-0.65 to -0.03) | -0.47 (-0.43 to -0.51)    | 0.024   |
| Percentage change from baseline to 120-days, %    | -13.15 (-17.44 to -8.87)  | -4.12 (-8.94 to 0.69)  | -9.03 (-8.50 to -9.56)    | 0.006   |
| TG                                                |                           |                        |                           |         |
| Baseline, mmol/L                                  | 2.79 (2.27 to 3.31)       | 2.76 (2.37 to 3.15)    | 0.03 (-0.09 to 0.16)      | 0.756   |
| 45-days, mmol/L                                   | 2.20 (1.69 to 2.71) **    | 2.46 (2.09 to 2.82) *  | -0.25 (-0.40 to -0.11)    | 0.101   |
| Absolute change from baseline to 45-days, mmol/L  | -0.59 (-0.96 to -0.22)    | -0.30 (-0.67 to 0.07)  | -0.29 (-0.29 to -0.29)    | 0.285   |
| Percentage change from baseline to 45-days, %     | -18.10 (-29.54 to -6.66)  | -5.64 (-17.35 to 6.07) | -12.46 (-12.19 to -12.73) | 0.133   |

| End outcomes                                      | NMS                       | Placebo                 | NMS vs. placebo           |         |
|---------------------------------------------------|---------------------------|-------------------------|---------------------------|---------|
|                                                   | mean (95%CI)              |                         | mean difference (95%CI)   | P value |
| 120-days, mmol/L                                  | 2.16 (1.81 to 2.51) ***   | 2.44 (2.05 to 2.83) *   | -0.28 (-0.24 to -0.32)    | 0.402   |
| Absolute change from baseline to 120-days, mmol/L | -0.63 (-0.98 to -0.28)    | -0.32 (-0.67 to 0.04)   | -0.31 (-0.30 to -0.32)    | 0.279   |
| Percentage change from baseline to 120-days, %    | -16.48 (-28.43 to -4.54)  | -5.52 (-20.02 to 8.97)  | -10.96 (-8.41 to -13.51)  | 0.245   |
| LDL-C                                             |                           |                         |                           |         |
| Baseline, mmol/L                                  | 3.62 (3.33 to 3.91)       | 3.48 (3.24 to 3.72)     | 0.14 (0.09 to 0.19)       | 0.691   |
| 45-days, mmol/L                                   | 3.17 (2.96 to 3.39) ***   | 3.47 (3.28 to 3.65)     | -0.29 (-0.32 to -0.27)    | 0.003   |
| Absolute change from baseline to 45-days, mmol/L  | -0.45 (-0.63 to -0.26)    | -0.01 (-0.16 to 0.14)   | -0.43 (-0.46 to -0.40)    | <0.001  |
| Percentage change from baseline to 45-days, %     | -11.27 (-15.66 to -6.88)  | 1.19 (-3.33 to 5.70)    | -12.46 (-12.33 to -12.58) | <0.001  |
| 120-days, mmol/L                                  | 3.24 (2.95 to 3.54) ***   | 3.42 (3.20 to 3.63)     | -0.17 (-0.26 to -0.08)    | 0.124   |
| Absolute change from baseline to 120-days, mmol/L | -0.37 (-0.57 to -0.18)    | -0.06 (-0.24 to 0.11)   | -0.31 (-0.33 to -0.29)    | 0.019   |
| Percentage change from baseline to 120-days, %    | -10.04 (-15.54 to -4.55)  | -0.28 (-5.44 to 4.88)   | -9.76 (-10.10 to -9.43)   | 0.010   |
| non-HDL-C                                         |                           |                         |                           |         |
| Baseline, mmol/L                                  | 4.54 (4.20 to 4.89)       | 4.39 (4.05 to 4.72)     | 0.15 (0.15 to 0.16)       | 0.723   |
| 45-days, mmol/L                                   | 3.72 (3.45 to 3.98) ***   | 4.14 (3.92 to 4.36) *   | -0.42 (-0.47 to -0.38)    | 0.015   |
| Absolute change from baseline to 45-days, mmol/L  | -0.82 (-1.10 to -0.55)    | -0.25 (-0.49 to -0.01)  | -0.58 (-0.61 to -0.54)    | 0.002   |
| Percentage change from baseline to 45-days, %     | -17.24 (-22.48 to -12.00) | -3.71 (-8.69 to 1.27)   | -13.53 (-13.79 to -13.27) | <0.001  |
| 120-days, mmol/L                                  | 3.62 (3.29 to 3.95) ***   | 3.94 (3.71 to 4.17) **  | -0.32 (-0.42 to -0.22)    | 0.108   |
| Absolute change from baseline to 120-days, mmol/L | -0.92 (-1.20 to -0.64)    | -0.44 (-0.75 to -0.13)  | -0.48 (-0.44 to -0.51)    | 0.023   |
| Percentage change from baseline to 120-days, %    | -19.82 (-25.53 to -14.11) | -7.74 (-13.82 to -1.65) | -12.09 (-11.71 to -12.46) | 0.004   |
| LDL-C to HDL-C ratio                              |                           |                         |                           |         |
| Baseline                                          | 2.61 (2.35 to 2.88)       | 2.51 (2.34 to 2.68)     | 0.11 (0.02 to 0.20)       | 0.736   |
| 45-days                                           | 2.18 (1.98 to 2.38) ***   | 2.41 (2.24 to 2.58) *   | -0.23 (-0.27 to -0.20)    | 0.077   |
| Absolute change from baseline to 45-days          | -0.44 (-0.57 to -0.30)    | -0.10 (-0.18 to -0.01)  | -0.34 (-0.38 to -0.29)    | <0.001  |
| Percentage change from baseline to 45-days, %     | -15.68 (-20.08 to -11.28) | -3.21 (-6.82 to 0.40)   | -12.47 (-13.26 to -11.68) | <0.001  |
| 120-days                                          | 2.17 (1.94 to 2.40) ***   | 2.31 (2.14 to 2.49) *   | -0.15 (-0.20 to -0.09)    | 0.301   |
| Absolute change from baseline to 120-days         | -0.45 (-0.59 to -0.30)    | -0.20 (-0.33 to -0.06)  | -0.25 (-0.27 to -0.24)    | 0.011   |
| Percentage change from baseline to 120-days, %    | -16.46 (-22.18 to -10.74) | -6.65 (-11.88 to -1.42) | -9.81 (-10.30 to -9.32)   | 0.012   |
| HDL-C                                             |                           |                         |                           |         |
| Baseline, mmol/L                                  | 1.43 (1.33 to 1.54)       | 1.41 (1.32 to 1.51)     | 0.02 (0.01 to 0.03)       | 0.823   |
| 45-days, mmol/L                                   | 1.51 (1.40 to 1.62) **    | 1.47 (1.38 to 1.57)     | 0.04 (0.02 to 0.05)       | 0.778   |
| Absolute change from baseline to 45-days, mmol/L  | 0.08 (0.02 to 0.13)       | 0.06 (0.00 to 0.12)     | 0.02 (0.02 to 0.01)       | 0.397   |
| Percentage change from baseline to 45-days, %     | 5.72 (1.99 to 9.45)       | 5.07 (0.45 to 9.69)     | 0.65 (1.54 to -0.24)      | 0.346   |
| 120-days, mmol/L                                  | 1.55 (1.44 to 1.65) ***   | 1.52 (1.40 to 1.63) **  | 0.03 (0.03 to 0.02)       | 0.525   |
| Absolute change from baseline to 120-days, mmol/L | 0.11 (0.05 to 0.18)       | 0.11 (0.04 to 0.17)     | 0.01 (0.01 to 0.00)       | 0.880   |
| Percentage change from baseline to 120-days, %    | 8.66 (4.06 to 13.26)      | 7.92 (3.13 to 12.72)    | 0.74 (0.93 to 0.55)       | 0.456   |
| Second outcomes                                   |                           |                         |                           |         |
| Right CIMT                                        |                           |                         |                           |         |
| Baseline, mm                                      | 0.83 (0.75 to 0.91)       | 0.88 (0.81 to 0.95)     | -0.05 (-0.07 to -0.04)    | 0.397   |
| 120-days, mm                                      | 0.87 (0.80 to 0.94)       | 0.93 (0.87 to 0.99)     | -0.06 (-0.07 to -0.06)    | 0.171   |
| Absolute change from baseline to 120-days, mm     | 0.04 (-0.05 to 0.13)      | 0.05 (0.00 to 0.10)     | -0.01 (-0.05 to 0.03)     | 0.907   |
| Percentage change from baseline to 120-days, %    | 12.49 (-3.64 to 28.62)    | 7.78 (0.57 to 14.99)    | 4.71 (-4.21 to 13.63)     | 0.907   |
| Left CIMT                                         |                           |                         |                           |         |
| Baseline, mm                                      | 0.88 (0.81 to 0.96)       | 0.94 (0.87 to 1.02)     | -0.06 (-0.06 to -0.06)    | 0.237   |

| End outcomes                                   | NMS                   | Placebo               | NMS vs. placebo         | P value |
|------------------------------------------------|-----------------------|-----------------------|-------------------------|---------|
|                                                | mean (95%CI)          |                       | mean difference (95%CI) |         |
| 120-days, mm                                   | 0.90 (0.83 to 0.97)   | 0.94 (0.87 to 1.02)   | -0.04 (-0.04 to -0.04)  | 0.369   |
| Absolute change from baseline to 120-days, mm  | 0.02 (-0.03 to 0.07)  | 0.00 (-0.07 to 0.07)  | 0.02 (0.04 to 0.00)     | 0.846   |
| Percentage change from baseline to 120-days, % | 3.74 (-3.46 to 10.95) | 2.41 (-5.32 to 10.14) | 1.34 (1.87 to 0.81)     | 0.871   |
| Average (Left and right) CIMT                  |                       |                       |                         |         |
| Baseline, mm                                   | 0.86 (0.79 to 0.93)   | 0.91 (0.85 to 0.97)   | -0.06 (-0.06 to -0.05)  | 0.228   |
| 120-days, mm                                   | 0.88 (0.82 to 0.95)   | 0.94 (0.88 to 1.00)   | -0.05 (-0.06 to -0.05)  | 0.205   |
| Absolute change from baseline to 120-days, mm  | 0.03 (-0.04 to 0.09)  | 0.03 (-0.03 to 0.08)  | 0.00 (-0.01 to 0.01)    | 0.773   |
| Percentage change from baseline to 120-days, % | 5.73 (-3.07 to 14.53) | 4.50 (-1.81 to 10.81) | 1.24 (-1.26 to 3.73)    | 0.785   |

Mean difference refers to the disparity between two groups. The difference is considered statistically significant when  $P < 0.05$ , denoted as \*; when  $P < 0.01$ , denoted as \*\*; and when  $P < 0.001$ , denoted as \*\*\*.

Subgroup analyses by sex were generally consistent with the previous results (Supplement Table S8).

## Supplement Table S8 Primary and second outcomes under sex subgroups

| End outcomes                                      | NMS                      | Placebo                   | NMS vs. placebo         | P value |
|---------------------------------------------------|--------------------------|---------------------------|-------------------------|---------|
|                                                   | mean (95%CI)             |                           | mean difference (95%CI) |         |
| Female                                            | NMS ( $n=45$ )           | Placebo ( $n=41$ )        |                         |         |
| Primary outcomes                                  |                          |                           |                         |         |
| TC                                                |                          |                           |                         |         |
| Baseline, mmol/L                                  | 5.93 (5.65 to 6.22)      | 6.00 (5.75 to 6.26)       | -0.07 (-0.10 to -0.04)  | 0.709   |
| 45-days, mmol/L                                   | 5.56 (5.36 to 5.77) ***  | 5.14 (4.91 to 5.37) **    | 0.42 (0.44 to 0.40)     | 0.007   |
| Absolute change from baseline to 45-days, mmol/L  | -0.37 (-0.60 to -0.14)   | -0.86 (-1.09 to -0.63)    | 0.49 (0.49 to 0.49)     | 0.003   |
| Percentage change from baseline to 45-days, %     | -4.97 (-8.65 to -1.30)   | -13.79 (-17.30 to -10.28) | 8.82 (8.65 to 8.98)     | <0.001  |
| 120-days, mmol/L                                  | 5.55 (5.35 to 5.75) ***  | 5.18 (4.92 to 5.44) **    | 0.37 (0.43 to 0.32)     | 0.024   |
| Absolute change from baseline to 120-days, mmol/L | -0.38 (-0.63 to -0.13)   | -0.83 (-1.05 to -0.60)    | 0.44 (0.42 to 0.46)     | 0.010   |
| Percentage change from baseline to 120-days, %    | -5.09 (-8.90 to -1.28)   | -13.35 (-16.94 to -9.76)  | 8.26 (8.04 to 8.47)     | 0.002   |
| TG                                                |                          |                           |                         |         |
| Baseline, mmol/L                                  | 2.77 (2.46 to 3.08)      | 2.64 (2.25 to 3.02)       | 0.13 (0.21 to 0.06)     | 0.254   |
| 45-days, mmol/L                                   | 2.43 (2.15 to 2.72) ***  | 2.12 (1.72 to 2.51) *     | 0.32 (0.42 to 0.21)     | 0.020   |
| Absolute change from baseline to 45-days, mmol/L  | -0.33 (-0.63 to -0.04)   | -0.52 (-0.84 to -0.19)    | 0.18 (0.21 to 0.16)     | 0.303   |
| Percentage change from baseline to 45-days, %     | -7.60 (-17.32 to 2.12)   | -15.48 (-29.16 to -1.80)  | 7.88 (11.84 to 3.92)    | 0.098   |
| 120-days, mmol/L                                  | 2.34 (2.04 to 2.63) ***  | 2.05 (1.76 to 2.33) ***   | 0.29 (0.29 to 0.30)     | 0.116   |
| Absolute change from baseline to 120-days, mmol/L | -0.43 (-0.70 to -0.16)   | -0.59 (-0.90 to -0.27)    | 0.16 (0.20 to 0.11)     | 0.497   |
| Percentage change from baseline to 120-days, %    | -11.94 (-20.55 to -3.33) | -15.41 (-29.08 to -1.75)  | 3.48 (8.53 to -1.58)    | 0.287   |
| LDL-C                                             |                          |                           |                         |         |
| Baseline, mmol/L                                  | 3.53 (3.35 to 3.72)      | 3.68 (3.46 to 3.89)       | -0.14 (-0.12 to -0.16)  | 0.528   |
| 45-days, mmol/L                                   | 3.45 (3.31 to 3.59) ***  | 3.13 (2.93 to 3.32)       | 0.32 (0.37 to 0.27)     | <0.001  |
| Absolute change from baseline to 45-days, mmol/L  | -0.08 (-0.21 to 0.04)    | -0.55 (-0.71 to -0.39)    | 0.46 (0.50 to 0.43)     | <0.001  |
| Percentage change from baseline to 45-days, %     | -1.01 (-4.61 to 2.59)    | -14.25 (-18.30 to -10.21) | 13.25 (13.69 to 12.80)  | <0.001  |

| End outcomes                                      | NMS                     | Placebo                   | NMS vs. placebo         |         |
|---------------------------------------------------|-------------------------|---------------------------|-------------------------|---------|
|                                                   | mean (95%CI)            |                           | mean difference (95%CI) | P value |
| 120-days, mmol/L                                  | 3.52 (3.35 to 3.68) *** | 3.25 (3.02 to 3.48)       | 0.27 (0.33 to 0.20)     | 0.010   |
| Absolute change from baseline to 120-days, mmol/L | -0.02 (-0.17 to 0.13)   | -0.43 (-0.60 to -0.25)    | 0.41 (0.43 to 0.38)     | <0.001  |
| Percentage change from baseline to 120-days, %    | 0.83 (-3.37 to 5.02)    | -11.18 (-15.84 to -6.52)  | 12.01 (12.47 to 11.54)  | <0.001  |
| non-HDL-C                                         |                         |                           |                         |         |
| Baseline, mmol/L                                  | 4.48 (4.23 to 4.74)     | 4.54 (4.28 to 4.80)       | -0.05 (-0.05 to -0.06)  | 0.955   |
| 45-days, mmol/L                                   | 4.11 (3.92 to 4.29) *** | 3.63 (3.40 to 3.87) ***   | 0.47 (0.53 to 0.42)     | <0.001  |
| Absolute change from baseline to 45-days, mmol/L  | -0.38 (-0.58 to -0.17)  | -0.91 (-1.13 to -0.68)    | 0.53 (0.55 to 0.51)     | <0.001  |
| Percentage change from baseline to 45-days, %     | -6.78 (-11.03 to -2.54) | -19.30 (-23.77 to -14.83) | 12.52 (12.74 to 12.29)  | <0.001  |
| 120-days, mmol/L                                  | 4.00 (3.82 to 4.18) *** | 3.60 (3.34 to 3.86) ***   | 0.40 (0.48 to 0.31)     | 0.003   |
| Absolute change from baseline to 120-days, mmol/L | -0.49 (-0.73 to -0.25)  | -0.94 (-1.17 to -0.70)    | 0.45 (0.45 to 0.46)     | 0.004   |
| Percentage change from baseline to 120-days, %    | -8.95 (-13.56 to -4.34) | -20.15 (-25.00 to -15.30) | 11.20 (11.44 to 10.96)  | <0.001  |
| LDL-C to HDL-C ratio                              |                         |                           |                         |         |
| Baseline                                          | 2.48 (2.34 to 2.61)     | 2.59 (2.38 to 2.80)       | -0.12 (-0.04 to -0.19)  | 0.600   |
| 45-days                                           | 2.41 (2.28 to 2.53) *** | 2.15 (1.95 to 2.35)       | 0.26 (0.34 to 0.19)     | 0.005   |
| Absolute change from baseline to 45-days          | -0.07 (-0.14 to -0.00)  | -0.45 (-0.55 to -0.34)    | 0.38 (0.42 to 0.34)     | <0.001  |
| Percentage change from baseline to 45-days, %     | -2.00 (-4.89 to 0.89)   | -16.97 (-20.81 to -13.12) | 14.97 (15.93 to 14.01)  | <0.001  |
| 120-days                                          | 2.31 (2.18 to 2.43) *** | 2.13 (1.92 to 2.33) **    | 0.18 (0.26 to 0.10)     | 0.027   |
| Absolute change from baseline to 120-days         | -0.17 (-0.27 to -0.07)  | -0.46 (-0.59 to -0.34)    | 0.29 (0.32 to 0.26)     | <0.001  |
| Percentage change from baseline to 120-days, %    | -5.77 (-9.63 to -1.92)  | -17.44 (-22.30 to -12.58) | 11.67 (12.68 to 10.66)  | <0.001  |
| HDL-C                                             |                         |                           |                         |         |
| Baseline, mmol/L                                  | 1.45 (1.38 to 1.52)     | 1.47 (1.38 to 1.55)       | -0.02 (-0.00 to -0.03)  | 0.938   |
| 45-days, mmol/L                                   | 1.46 (1.39 to 1.53) *   | 1.51 (1.42 to 1.60)       | -0.05 (-0.03 to -0.07)  | 0.460   |
| Absolute change from baseline to 45-days, mmol/L  | 0.01 (-0.04 to 0.06)    | 0.05 (0.01 to 0.08)       | -0.04 (-0.05 to -0.03)  | 0.224   |
| Percentage change from baseline to 45-days, %     | 1.44 (-2.09 to 4.98)    | 3.51 (0.83 to 6.20)       | -2.07 (-2.92 to -1.22)  | 0.197   |
| 120-days, mmol/L                                  | 1.55 (1.47 to 1.64) *** | 1.58 (1.49 to 1.67) ***   | -0.03 (-0.02 to -0.03)  | 0.616   |
| Absolute change from baseline to 120-days, mmol/L | 0.10 (0.05 to 0.16)     | 0.11 (0.07 to 0.16)       | -0.01 (-0.02 to 0.00)   | 0.382   |
| Percentage change from baseline to 120-days, %    | 7.84 (3.93 to 11.74)    | 8.41 (5.19 to 11.63)      | -0.57 (-1.26 to 0.11)   | 0.416   |
| Second outcomes                                   |                         |                           |                         |         |
| Right CIMT                                        |                         |                           |                         |         |
| Baseline, mm                                      | 0.81 (0.75 to 0.87)     | 0.81 (0.75 to 0.87)       | -0.00 (0.00 to -0.01)   | 0.930   |
| 120-days, mm                                      | 0.86 (0.81 to 0.92)     | 0.84 (0.79 to 0.89) *     | 0.03 (0.02 to 0.03)     | 0.499   |
| Absolute change from baseline to 120-days, mm     | 0.06 (0.01 to 0.10)     | 0.03 (-0.03 to 0.09)      | 0.03 (0.04 to 0.01)     | 0.363   |
| Percentage change from baseline to 120-days, %    | 9.53 (2.87 to 16.18)    | 8.55 (-2.38 to 19.48)     | 0.98 (5.25 to -3.30)    | 0.369   |
| Left CIMT                                         |                         |                           |                         |         |
| Baseline, mm                                      | 0.87 (0.80 to 0.93)     | 0.85 (0.79 to 0.91)       | 0.02 (0.02 to 0.02)     | 0.683   |
| 120-days, mm                                      | 0.88 (0.82 to 0.93)     | 0.87 (0.81 to 0.93)       | 0.01 (0.01 to 0.01)     | 0.818   |
| Absolute change from baseline to 120-days, mm     | 0.01 (-0.04 to 0.07)    | 0.02 (-0.02 to 0.06)      | -0.01 (-0.03 to 0.01)   | 0.798   |
| Percentage change from baseline to 120-days, %    | 4.19 (-2.67 to 11.05)   | 3.82 (-1.48 to 9.12)      | 0.37 (-1.19 to 1.93)    | 0.932   |
| Average (Left and right) CIMT                     |                         |                           |                         |         |
| Baseline, mm                                      | 0.84 (0.79 to 0.89)     | 0.83 (0.77 to 0.89)       | 0.01 (0.01 to 0.00)     | 0.886   |
| 120-days, mm                                      | 0.87 (0.82 to 0.92)     | 0.85 (0.80 to 0.90)       | 0.02 (0.02 to 0.02)     | 0.581   |
| Absolute change from baseline to 120-days, mm     | 0.03 (-0.01 to 0.08)    | 0.02 (-0.02 to 0.06)      | 0.01 (0.01 to 0.01)     | 0.665   |
| Percentage change from baseline to 120-days, %    | 5.88 (0.24 to 11.52)    | 4.23 (-1.67 to 10.12)     | 1.65 (1.91 to 1.40)     | 0.682   |
| Male                                              | NMS (n=13)              | Placebo (n=14)            |                         |         |

| End outcomes                                      | NMS                     | Placebo                   | NMS vs. placebo         |         |
|---------------------------------------------------|-------------------------|---------------------------|-------------------------|---------|
|                                                   | mean (95%CI)            |                           | mean difference (95%CI) | P value |
| Primary outcomes                                  |                         |                           |                         |         |
| TC                                                |                         |                           |                         |         |
| Baseline, mmol/L                                  | 5.60 (5.15 to 6.05)     | 5.93 (5.49 to 6.37)       | -0.33 (-0.34 to -0.32)  | 0.356   |
| 45-days, mmol/L                                   | 5.40 (5.07 to 5.72) *** | 4.83 (4.41 to 5.24)       | 0.57 (0.67 to 0.47)     | 0.024   |
| Absolute change from baseline to 45-days, mmol/L  | -0.20 (-0.65 to 0.25)   | -1.10 (-1.69 to -0.51)    | 0.90 (1.04 to 0.76)     | 0.024   |
| Percentage change from baseline to 45-days, %     | -2.40 (-10.42 to 5.63)  | -17.56 (-26.17 to -8.94)  | 15.16 (15.75 to 14.57)  | 0.019   |
| 120-days, mmol/L                                  | 5.51 (5.16 to 5.86) *** | 5.04 (4.51 to 5.58)       | 0.47 (0.65 to 0.28)     | 0.152   |
| Absolute change from baseline to 120-days, mmol/L | -0.09 (-0.35 to 0.17)   | -0.88 (-1.27 to -0.50)    | 0.80 (0.92 to 0.67)     | 0.003   |
| Percentage change from baseline to 120-days, %    | -0.96 (-5.69 to 3.78)   | -14.92 (-21.56 to -8.28)  | 13.96 (15.87 to 12.05)  | 0.002   |
| TG                                                |                         |                           |                         |         |
| Baseline, mmol/L                                  | 2.64 (2.07 to 3.20)     | 2.73 (2.32 to 3.14)       | -0.09 (-0.24 to 0.06)   | 0.627   |
| 45-days, mmol/L                                   | 2.10 (1.66 to 2.54) *   | 1.98 (1.56 to 2.39)       | 0.12 (0.09 to 0.15)     | 0.593   |
| Absolute change from baseline to 45-days, mmol/L  | -0.54 (-1.11 to 0.03)   | -0.75 (-1.27 to -0.24)    | 0.21 (0.16 to 0.26)     | 0.519   |
| Percentage change from baseline to 45-days, %     | -13.33 (-35.42 to 8.77) | -23.65 (-43.19 to -4.12)  | 10.33 (7.77 to 12.89)   | 0.430   |
| 120-days, mmol/L                                  | 2.57 (2.19 to 2.95) *   | 2.12 (1.68 to 2.57)       | 0.44 (0.50 to 0.39)     | 0.094   |
| Absolute change from baseline to 120-days, mmol/L | -0.07 (-0.52 to 0.38)   | -0.61 (-1.13 to -0.08)    | 0.54 (0.61 to 0.47)     | 0.062   |
| Percentage change from baseline to 120-days, %    | 7.93 (-19.75 to 35.61)  | -18.11 (-38.23 to 2.01)   | 26.04 (18.47 to 33.60)  | 0.094   |
| LDL-C                                             |                         |                           |                         |         |
| Baseline, mmol/L                                  | 3.65 (3.30 to 4.00)     | 3.63 (3.30 to 3.96)       | 0.03 (0.01 to 0.04)     | 0.903   |
| 45-days, mmol/L                                   | 3.62 (3.34 to 3.90) *** | 2.96 (2.57 to 3.36)       | 0.65 (0.77 to 0.54)     | 0.009   |
| Absolute change from baseline to 45-days, mmol/L  | -0.03 (-0.29 to 0.22)   | -0.66 (-1.02 to -0.31)    | 0.63 (0.73 to 0.52)     | 0.006   |
| Percentage change from baseline to 45-days, %     | 0.12 (-7.17 to 7.40)    | -17.95 (-27.25 to -8.66)  | 18.07 (20.08 to 16.06)  | 0.005   |
| 120-days, mmol/L                                  | 3.83 (3.51 to 4.15) **  | 3.28 (2.83 to 3.72) *     | 0.55 (0.68 to 0.42)     | 0.037   |
| Absolute change from baseline to 120-days, mmol/L | 0.17 (0.01 to 0.34)     | -0.35 (-0.56 to -0.14)    | 0.52 (0.57 to 0.48)     | 0.001   |
| Percentage change from baseline to 120-days, %    | 5.31 (0.61 to 10.01)    | -10.42 (-16.79 to -4.04)  | 15.72 (17.40 to 14.05)  | 0.001   |
| non-HDL-C                                         |                         |                           |                         |         |
| Baseline, mmol/L                                  | 4.38 (3.94 to 4.82)     | 4.54 (4.14 to 4.93)       | -0.16 (-0.20 to -0.11)  | 0.627   |
| 45-days, mmol/L                                   | 4.15 (3.83 to 4.47) *** | 3.41 (2.91 to 3.91)       | 0.74 (0.92 to 0.55)     | 0.019   |
| Absolute change from baseline to 45-days, mmol/L  | -0.23 (-0.63 to 0.17)   | -1.12 (-1.67 to -0.57)    | 0.89 (1.05 to 0.74)     | 0.011   |
| Percentage change from baseline to 45-days, %     | -3.56 (-12.64 to 5.53)  | -23.96 (-35.42 to -12.50) | 20.40 (22.79 to 18.02)  | 0.006   |
| 120-days, mmol/L                                  | 4.23 (3.92 to 4.54) *** | 3.62 (3.12 to 4.12)       | 0.60 (0.80 to 0.41)     | 0.052   |
| Absolute change from baseline to 120-days, mmol/L | -0.15 (-0.43 to 0.13)   | -0.91 (-1.28 to -0.55)    | 0.76 (0.85 to 0.67)     | 0.003   |
| Percentage change from baseline to 120-days, %    | -2.27 (-8.44 to 3.90)   | -20.26 (-28.84 to -11.67) | 17.99 (20.40 to 15.57)  | 0.002   |
| LDL-C to HDL-C ratio                              |                         |                           |                         |         |
| Baseline                                          | 3.07 (2.60 to 3.54)     | 2.75 (2.32 to 3.19)       | 0.32 (0.29 to 0.35)     | 0.290   |
| 45-days                                           | 3.00 (2.55 to 3.44) *** | 2.24 (1.79 to 2.69)       | 0.76 (0.76 to 0.75)     | 0.015   |
| Absolute change from baseline to 45-days          | -0.07 (-0.19 to 0.05)   | -0.51 (-0.71 to -0.31)    | 0.44 (0.51 to 0.36)     | <0.001  |
| Percentage change from baseline to 45-days, %     | -2.14 (-6.13 to 1.85)   | -20.00 (-28.36 to -11.64) | 17.86 (22.23 to 13.49)  | <0.001  |
| 120-days                                          | 3.04 (2.70 to 3.38) *** | 2.41 (1.98 to 2.84)       | 0.63 (0.72 to 0.54)     | 0.020   |
| Absolute change from baseline to 120-days         | -0.03 (-0.26 to 0.20)   | -0.34 (-0.48 to -0.20)    | 0.31 (0.22 to 0.40)     | 0.021   |
| Percentage change from baseline to 120-days, %    | 0.64 (-5.80 to 7.08)    | -13.00 (-17.73 to -8.26)  | 13.64 (11.93 to 15.34)  | 0.001   |
| HDL-C                                             |                         |                           |                         |         |

| End outcomes                                      | NMS                   | Placebo                | NMS vs. placebo         |         |
|---------------------------------------------------|-----------------------|------------------------|-------------------------|---------|
|                                                   | mean (95%CI)          |                        | mean difference (95%CI) | P value |
| Baseline, mmol/L                                  | 1.22 (1.11 to 1.32)   | 1.39 (1.18 to 1.60)    | -0.17 (-0.07 to -0.28)  | 0.126   |
| 45-days, mmol/L                                   | 1.24 (1.12 to 1.36)   | 1.41 (1.23 to 1.59)    | -0.17 (-0.11 to -0.22)  | 0.106   |
| Absolute change from baseline to 45-days, mmol/L  | 0.03 (-0.05 to 0.10)  | 0.02 (-0.06 to 0.10)   | 0.01 (0.01 to 0.00)     | 0.906   |
| Percentage change from baseline to 45-days, %     | 2.29 (-4.00 to 8.57)  | 2.58 (-3.33 to 8.50)   | -0.30 (-0.67 to 0.08)   | 0.941   |
| 120-days, mmol/L                                  | 1.28 (1.16 to 1.40)   | 1.42 (1.23 to 1.61)    | -0.14 (-0.07 to -0.20)  | 0.198   |
| Absolute change from baseline to 120-days, mmol/L | 0.06 (-0.02 to 0.14)  | 0.03 (-0.04 to 0.09)   | 0.03 (0.02 to 0.05)     | 0.474   |
| Percentage change from baseline to 120-days, %    | 5.39 (-0.70 to 11.48) | 2.98 (-2.15 to 8.12)   | 2.41 (1.45 to 3.37)     | 0.518   |
| Second outcomes                                   |                       |                        |                         |         |
| Right CIMT                                        |                       |                        |                         |         |
| Baseline, mm                                      | 0.82 (0.68 to 0.96)   | 0.90 (0.78 to 1.02)    | -0.08 (-0.10 to -0.05)  | 0.375   |
| 120-days, mm                                      | 0.85 (0.71 to 0.98)   | 0.88 (0.77 to 0.99)    | -0.03 (-0.06 to -0.01)  | 0.605   |
| Absolute change from baseline to 120-days, mm     | 0.02 (-0.07 to 0.11)  | -0.02 (-0.13 to 0.09)  | 0.04 (0.07 to 0.02)     | 0.507   |
| Percentage change from baseline to 120-days, %    | 4.69 (-5.78 to 15.16) | 0.42 (-12.57 to 13.41) | 4.27 (6.79 to 1.75)     | 0.542   |
| Left CIMT                                         |                       |                        |                         |         |
| Baseline, mm                                      | 0.93 (0.75 to 1.11)   | 0.96 (0.83 to 1.09)    | -0.03 (-0.08 to 0.02)   | 0.770   |
| 120-days, mm                                      | 0.91 (0.74 to 1.07)   | 0.95 (0.82 to 1.08)    | -0.04 (-0.07 to -0.01)  | 0.695   |
| Absolute change from baseline to 120-days, mm     | -0.02 (-0.13 to 0.08) | -0.01 (-0.07 to 0.06)  | -0.02 (-0.06 to 0.02)   | 0.695   |
| Percentage change from baseline to 120-days, %    | -0.87 (-9.85 to 8.12) | -0.30 (-8.59 to 7.99)  | -0.57 (-1.27 to 0.13)   | 0.674   |
| Average (Left and right) CIMT                     |                       |                        |                         |         |
| Baseline, mm                                      | 0.88 (0.73 to 1.03)   | 0.93 (0.81 to 1.04)    | -0.05 (-0.09 to -0.02)  | 0.626   |
| 120-days, mm                                      | 0.88 (0.73 to 1.02)   | 0.91 (0.80 to 1.02)    | -0.04 (-0.07 to -0.00)  | 0.715   |
| Absolute change from baseline to 120-days, mm     | 0.00 (-0.07 to 0.07)  | -0.01 (-0.08 to 0.05)  | 0.01 (0.01 to 0.02)     | 0.512   |
| Percentage change from baseline to 120-days, %    | 1.04 (-6.39 to 8.48)  | -0.59 (-8.83 to 7.65)  | 1.63 (2.43 to 0.83)     | 0.464   |

Mean difference refers to the disparity between two groups. The difference is considered statistically significant when  $P < 0.05$ , denoted as \*; when  $P < 0.01$ , denoted as \*\*; and when  $P < 0.001$ , denoted as \*\*\*.
